# 1 The genome of *Ectocarpus subulatus* 2 highlights unique mechanisms for 3 stress tolerance in brown algae

---

4  
5 Simon M. Dittami<sup>1\*</sup>, Erwan Corre<sup>2</sup>, Loraine Brillet-Guéguen<sup>1,2</sup>, Noé Pontoizeau<sup>1,2</sup>, Meziane Aite<sup>3</sup>,  
6 Komlan Avia<sup>1</sup>, Christophe Caron<sup>2</sup>, Chung Hyun Cho<sup>4</sup>, Jonas Collén<sup>1</sup>, Alexandre Cormier<sup>1</sup>, Ludovic  
7 Delage<sup>1</sup>, Sylvie Doubleau<sup>5</sup>, Clémence Frioux<sup>3</sup>, Angélique Gobet<sup>1</sup>, Irene González-Navarrete<sup>6</sup>, Agnès  
8 Groisillier<sup>1</sup>, Cécile Hervé<sup>1</sup>, Didier Jollivet<sup>7</sup>, Hetty KleinJan<sup>1</sup>, Catherine Leblanc<sup>1</sup>, Agnieszka P. Lipinska<sup>1</sup>,  
9 Xi Liu<sup>2</sup>, Dominique Marie<sup>7</sup>, Gabriel V. Markov<sup>1</sup>, André E. Minoche<sup>6,8</sup>, Misharl Monsoor<sup>2</sup>, Pierre  
10 Pericard<sup>2</sup>, Marie-Mathilde Perrineau<sup>1</sup>, Akira F. Peters<sup>9</sup>, Anne Siegel<sup>3</sup>, Amandine Siméon<sup>1</sup>, Camille  
11 Trottier<sup>3</sup>, Hwan Su Yoon<sup>4</sup>, Heinz Himmelbauer<sup>6,8,10</sup>, Catherine Boyen<sup>1</sup>, Thierry Tonon<sup>1,11</sup>

12 <sup>1</sup> Sorbonne Université, CNRS, Integrative Biology of Marine Models (LBI2M), Station Biologique de  
13 Roscoff, 29680 Roscoff, France

14 <sup>2</sup> CNRS, Sorbonne Université, FR2424, ABiMS platform, Station Biologique de Roscoff, 29680, Roscoff,  
15 France

16 <sup>3</sup> Institute for Research in IT and Random Systems - IRISA, Université de Rennes 1, France

17 <sup>4</sup> Department of Biological Sciences, Sungkyunkwan University, Suwon 16419, Korea

18 <sup>5</sup> IRD, UMR DIADE, 911 Avenue Agropolis, BP 64501, 34394 Montpellier, France

19 <sup>6</sup> Centre for Genomic Regulation (CRG), The Barcelona Institute of Science and Technology, Dr.  
20 Aiguader 88, Barcelona, 08003 Spain

21 <sup>7</sup> Sorbonne Université, CNRS, Adaptation and Diversity in the Marine Environment (ADME), Station  
22 Biologique de Roscoff (SBR), 29680 Roscoff, France

23 <sup>8</sup> Max Planck Institute for Molecular Genetics, 14195 Berlin, Germany

24 <sup>9</sup> Bezhin Rosko, 40 Rue des Pêcheurs, 29250 Santec, France

25 <sup>10</sup> Department of Biotechnology, University of Natural Resources and Life Sciences (BOKU), Vienna,  
26 1190 Vienna, Austria

27 <sup>11</sup> Centre for Novel Agricultural Products, Department of Biology, University of York, Heslington, York,  
28 YO10 5DD, United Kingdom.

29

30 \* Correspondence: [simon.dittami@sb-rocoff.fr](mailto:simon.dittami@sb-rocoff.fr), phone +33 29 82 92 362, fax +33 29 82 92 324.

## 31 Abstract

32

33 Brown algae are multicellular photosynthetic organisms belonging to the stramenopile lineage. They  
34 are successful colonizers of marine rocky shores world-wide. The genus *Ectocarpus*, and especially  
35 strain Ec32, has been established as a genetic and genomic model for brown algae. A related species,  
36 *Ectocarpus subulatus* Kützinger, is characterized by its high tolerance of abiotic stress. Here we present  
37 the genome and metabolic network of a haploid male strain of *E. subulatus*, establishing it as a  
38 comparative model to study the genomic bases of stress tolerance in *Ectocarpus*. Our analyses  
39 indicate that *E. subulatus* has separated from *Ectocarpus* sp. Ec32 via allopatric speciation. Since this  
40 event, its genome has been shaped by the activity of viruses and large retrotransposons, which in  
41 the case of chlorophyll-binding proteins, may be related to the expansion of this gene family. We  
42 have identified a number of further genes that we suspect to contribute to stress tolerance in *E.*  
43 *subulatus*, including an expanded family of heat shock proteins, the reduction of genes involved in  
44 the production of halogenated defense compounds, and the presence of fewer cell wall  
45 polysaccharide-modifying enzymes. However, 96% of genes that differed between the two examined  
46 *Ectocarpus* species, as well as 92% of genes under positive selection, were found to be lineage-  
47 specific and encode proteins of unknown function. This underlines the uniqueness of brown algae  
48 with respect to their stress tolerance mechanisms as well as the significance of establishing *E.*  
49 *subulatus* as a comparative model for future functional studies.

## 50 Introduction

51 Brown algae (Phaeophyceae) are multicellular photosynthetic organisms that are successful  
52 colonizers of rocky shores of the world's oceans, in particular in temperate and polar regions. In many  
53 places they constitute the dominant vegetation in the intertidal zone, where they have adapted to  
54 multiple stressors including strong variations in temperature, salinity, irradiation, and mechanical  
55 stress (wave action) over the tidal cycle (Davison and Pearson, 1996). In the subtidal environment,  
56 brown algae form large kelp forests that harbor highly diverse communities. They are also harvested  
57 as food or for industrial purposes, such as the extraction of alginates (McHugh, 2003). The worldwide  
58 annual harvest of brown algae has reached 10 million tons by 2014 and is constantly growing (FAO,  
59 2016). Brown algae share some basic photosynthetic machinery with land plants, but their plastids  
60 derived from a secondary or tertiary endosymbiosis event with a red alga, and they belong to an  
61 independent lineage of Eukaryotes, the Stramenopiles (Archibald, 2009). This phylogenetic  
62 background, together with their distinct habitat, contributes to the fact that brown algae have  
63 evolved numerous unique metabolic pathways, life cycle features, and stress tolerance mechanisms.

64 To enable functional studies of brown algae, strain Ec32 of the small filamentous alga *Ectocarpus* sp.  
65 has been established as a genetic and genomic model organism (Peters *et al.*, 2004; Cock *et al.*, 2010;  
66 Heesch *et al.*, 2010). This strain was formerly described as *Ectocarpus siliculosus*, but has since been  
67 shown to belong to an independent clade by molecular methods (Stache-Crain *et al.*, 1997; Peters *et al.*,  
68 2015). More recently two additional brown algal genomes, that of the kelp species *Saccharina*  
69 *japonica* (Ye *et al.*, 2015) and that of *Cladosiphon okamuranus* (Nishitsuji *et al.*, 2016), have been  
70 characterized. Comparisons between these three genomes have allowed researchers to obtain a first  
71 overview of the unique genomic features of brown algae, as well as a glimpse of the genetic diversity  
72 within this group. However, given the evolutionary distance between these algae, it is difficult to link  
73 genomic differences to physiological differences and possible adaptations to their lifestyle. To be  
74 able to generate more accurate hypotheses on the role of particular genes and genomic features for  
75 adaptive traits, a common strategy is to compare closely related strains and species that differ only  
76 in a few genomic features. The genus *Ectocarpus* is particularly well suited for such comparative  
77 studies because it comprises a wide range of morphologically similar but genetically distinct strains  
78 and species that have adapted to different marine and brackish water environments (Stache-Crain  
79 *et al.*, 1997; Montecinos *et al.*, 2017). One species within this group, *Ectocarpus subulatus* Kützinger  
80 (Peters *et al.*, 2015) has separated from *Ectocarpus* sp. Ec32 approximately 16 million years ago (Mya;  
81 Dittami *et al.*, 2012). It comprises isolates highly resistant to elevated temperature (Bolton, 1983)  
82 and low salinity. A strain of this species was even isolated from freshwater (West and Kraft, 1996),  
83 constituting one of the handful of known marine-freshwater transitions in brown algae (Dittami *et al.*,  
84 2017).

85 Here we present the draft genome and metabolic network of a strain of *E. subulatus*, establishing  
86 the genomic basis for its use as a comparative model to study stress tolerance mechanisms, and in  
87 particular of low salinity tolerance, in brown algae. Similar strategies have previously been  
88 successfully employed in terrestrial plants, where “extremophile” relatives of model- or economically  
89 relevant species have been sequenced to explore new stress tolerance mechanisms in the green

90 lineage (Oh *et al.*, 2012; Dittami and Tonon, 2012; Dassanayake *et al.*, 2011; Amtmann, 2009; Ma *et*  
91 *al.*, 2013; Zeng *et al.*, 2015). The study of the *E. subulatus* genome, and subsequent comparative  
92 analysis with other brown algal genomes, in particular that of *Ectocarpus* sp. Ec32, provides insights  
93 into the dynamics of *Ectocarpus* genome evolution and divergence, and highlights important  
94 adaptive processes, such as a potentially retrotransposon driven expansion of the family of  
95 chlorophyll-binding proteins with subsequent diversification. Most importantly, our analyses  
96 underline that most of the observed differences between the examined species of *Ectocarpus*  
97 correspond to lineage-specific proteins with yet unknown functions.

## 98 **Results**

### 99 **Sequencing and assembly of the *E. subulatus* genome**

100 A total of 34.7 Gb of paired-end read data and of 28.8 Gb of mate pair reads (corresponding to 45  
101 million non-redundant mate-pairs) were obtained and used to generate an initial assembly with a  
102 total length of 350 Mb, an N50 length of 159 kb, and 8% undefined bases (Ns). However, as  
103 sequencing was carried out on DNA from algal material that had not been treated with antibiotics, a  
104 substantial part of the assembled scaffolds was of bacterial origin. Removal of these sequences from  
105 the final assembly resulted in the final 227 Mb genome assembly with an average GC content of 54%  
106 (Table 1). After all cleaning and filtering steps, and considering only algal scaffolds, the average  
107 sequencing coverage was 67 X for the pair end library and the genomic coverage (number of unique  
108 algal mate pairs \* span size / assembly size) was 6.9, 14.4, and 30.4 X for the 3 kb, 5 kb, and 10 kb  
109 mate pair libraries, respectively. The bacterial sequences corresponded predominantly to  
110 *Alphaproteobacteria* (50%, with the dominant genera *Roseobacter* 8% and *Hyphomonas* 5%)  
111 followed by *Gammaproteobacteria* (18%) and *Flavobacteria* (13%). RNA-seq experiments yielded a  
112 total of 4.2 Gb of sequence data for a culture of *E. subulatus* Bft15b cultivated in seawater.  
113 Furthermore, 4.5 Gb and 4.3 Gb were obtained for two libraries of a freshwater strain of *E. subulatus*  
114 from Hopkins River Falls after growth in seawater and in diluted medium, respectively. Of these,  
115 96.6% (Bft15b strain in seawater), 87.6% (freshwater strain in seawater), and 85.3% (freshwater  
116 strain in diluted medium) were successfully mapped against the final genome assembly of the Bft15b  
117 strain.

### 118 **Gene prediction and annotation**

119 Gene prediction was carried out following the protocol employed for *Ectocarpus* sp. Ec32 (Cock *et*  
120 *al.*, 2010) using Eugene. The number of predicted proteins was 60% higher than that predicted for  
121 Ec32 (Table 1), but this difference can be explained to a large part by the fact that mono-exonic genes  
122 (many of which corresponding to transposases) were not removed from our predictions, but were  
123 manually removed from the Ec32 genome. This is also coherent with the lower mean number of  
124 introns per gene observed in the Bft15b strain. For 10,395 (40 %) of these predicted proteins  
125 automatic annotations were generated based on BlastP searches against the Swiss-Prot database;  
126 furthermore 724 proteins were manually annotated. The complete set of predicted proteins was  
127 used to evaluate the completeness of the genome based on the presence of conserved core

128 eukaryote genes using BUSCO (Simão *et al.*, 2015). This revealed the *E. subulatus* genome to be 86%  
129 complete using the full set of conserved eukaryotic genes, and 91% when not considering proteins  
130 also absent from all sequenced known brown algae.

### 131 Repeated elements

132 Using the REPET pipeline, we determined that, similar to results obtained for strain Ec32, the *E.*  
133 *subulatus* genome consisted of 30% repeated elements, *i.e.* 10% less than *S. japonica*. The most  
134 abundant groups of repeated elements were large retrotransposon derivatives (LARDs), followed by  
135 long terminal repeats (LTRs, predominantly Copia and Gypsy), and long and short interspersed  
136 nuclear elements (LINEs). The overall distribution of sequence identity levels within superfamilies  
137 showed two peaks, one at an identity level of 78-80%, and one at 96-100% (Figure 1), indicating two  
138 periods of high transposon activity in the past. Terminal repeat retrotransposons in miniature (TRIM)  
139 and LARDs, both non-autonomous groups of retrotransposons, were among the most conserved  
140 families (Figure 1B). In line with previous observations carried out in *Ectocarpus* sp. Ec32, no  
141 methylation was detected in the *E. subulatus* genomic DNA, an indication that methylation was most  
142 likely not a mechanism to silence transposons in this species.

### 143 Organellar genomes

144 Plastid and mitochondrial genomes from *E. subulatus* have 95.5% and 91.5% sequence identity with  
145 their *Ectocarpus* sp. Ec32 counterparts, respectively, in the conserved regions (Figure 2). The  
146 mitochondrial genome of *E. subulatus* differed from that of *Ectocarpus* sp. Ec32 essentially with  
147 respect to the presence of three additional maturase genes, as well as one and two introns within  
148 the 16S and 23S rRNA genes, respectively. A large structural difference was observed only in the  
149 plastid genome where one inversion of *ca.* 50 kb in the small single copy (SSC) region may have  
150 occurred. Furthermore, small differences in gene contents of the *E. subulatus* plastid with respect to  
151 *Ectocarpus* sp. Ec32 were detected around two inverted repeat (IR) regions concerning the following  
152 genes: psbC (gene truncated), psbD (IR region next to gene), rpoB (large gap, frameshift), and tRNA-  
153 Arg and tRNA-Glu (duplicated in the tRNA region). Pseudogenization of genes at the edge of IRs is  
154 indeed a common phenomenon (Lee *et al.*, 2016).

### 155 Global comparison of predicted proteomes

#### 156 GO-based comparisons

157 OrthoFinder was used to define clusters of predicted orthologs as well as species-specific proteins.  
158 As shown in Figure 3, 11,177 predicted Bft15b proteins had no ortholog in Ec32, while the reverse  
159 was true for only 3,605 proteins of strain Ec32. Furthermore, among the clusters of genes, we  
160 observed differences in copy number for several of the proteins between the two species. Using gene  
161 set enrichment analyses, we attempted to automatically identify functional groups of genes that  
162 were over-represented either among the proteins specific to one or the other genome, or that were  
163 expanded in one of the two genomes. The results of these analyses point towards several functional  
164 groups of proteins that were subject to recent variations between *E. subulatus* and *Ectocarpus* sp.  
165 Ec32 (Figure 3). Categories identified as over-represented among the genes unique to *E. subulatus*  
166 include DNA integration, chlorophyll binding, and DNA binding, but also false positives such as red

167 light signaling, which arise from the presence of transposable elements in the genome (see  
168 Supporting Information File S1). However, no significantly enriched GO terms were found among  
169 protein families expanded in the *E. subulatus* genome. In contrast, several categories were over-  
170 represented among the genes and gene families specific to or expanded in the *Ectocarpus* sp. Ec32  
171 strain, many of which were related either to signaling pathways or to the membrane and transporters  
172 (Figure 3), although differences with respect to membrane and transporters were not confirmed  
173 after manual curation.

#### 174 **Domain-based comparisons**

175 Domain-based comparisons were carried out to avoid a possible impact of moderate or poor-quality  
176 annotations on the genomic comparisons. In total, 5,728 different InterPro domains were detected  
177 in both *Ectocarpus* genomes, with 133,448 and 133,052 instances in *E. subulatus* Bft15b and  
178 *Ectocarpus* sp. Ec32 strains respectively. The most common domains in *E. subulatus* were Zinc finger,  
179 CCHC-type (IPR001878, 3,861 instances), and Ribonuclease H-like (IPR012337, 3,742 instances). Both  
180 were present less than 200 times in Ec32. The most common domains in *Ectocarpus* sp. Ec32 were  
181 the ankyrin repeat and ankyrin repeat-containing domains (IPR002110, IPR020683: 4,138 and 4,062  
182 occurrences vs *ca.* 3,000 in Bft15b). Two hundred and ninety-six domains were specific to Bft15b,  
183 while 582 were specific to Ec32 (see Supporting Information Table S2).

#### 184 **Metabolic network-based comparisons**

185 In total, the *E. subulatus* metabolic network reconstruction comprised 2,445 genes associated with  
186 2,074 metabolic reactions and 2,173 metabolites in 464 pathways, 259 of which were complete  
187 (Figure 3). These results are similar to data previously obtained for *Ectocarpus* sp. Ec32 (Prigent *et*  
188 *al.*, 2014; see <http://gem-aureme.irisa.fr/ectogem> for the most recent version; 1,977 reactions,  
189 2,132 metabolites, 2,281 genes, 459 pathways, 272 complete pathways). Comparisons between both  
190 networks were carried out on a pathway level (Supporting Information Table S3), focusing on  
191 pathways present (*i.e.* complete to more than 50%) in one of the species, but with no reactions in  
192 the other. This led to the identification of 16 pathways potentially specific to *E. subulatus* Bft15b,  
193 and 11 specific to *Ectocarpus* sp. Ec32, which were further manually investigated. In all of the  
194 examined cases, the observed differences were due to protein annotation, but not due to the  
195 presence/absence of proteins associated with these pathways in both species. For instance, the  
196 pathways "spermine and spermidine degradation III" (PWY-6441) was only found in *E. subulatus*  
197 because the corresponding genes had been manually annotated in this species, while this was not  
198 the case in *Ectocarpus* sp. Ec32. On the other hand, three pathways related to methanogenesis (PWY-  
199 5247, PWY-5248, and PWY-5250) were falsely included in the metabolic network of *E. subulatus* due  
200 to an overly precise automatic GO annotation of the gene Bft140\_7. All in all, based on our network  
201 comparisons, we confirmed no differences regarding the presence or absence of known metabolic  
202 pathways in the two examined species of *Ectocarpus*.

#### 203 **Genes under positive selection**

204 In total, 7,147 pairs of orthologs were considered to search for genes under positive selection  
205 between the two examined strains of *Ectocarpus*, and we identified 83 gene pairs (1.2%) that  
206 exhibited dN/dS ratios > 1 (Supporting Information Table S4). This proportion was low compared to



207 the 12% of genes under positive selection found in a study comprising also kelp and diatom species  
208 (Teng *et al.*, 2017). Note however, that our analysis focused on the global dN/dS ratio per gene,  
209 rather than the local dN/dS ratio per codon site (implemented in codeml, PAML) used by Teng *et al.*  
210 (2017). The gene pairs under positive selection may be related to the adaptation to the different  
211 environmental niches occupied by the strains investigated. These gene pairs were examined  
212 manually, but only one of them (Ec-11\_002330, EsuBft305\_15) could be assigned a function, *i.e.* a  
213 putative mannosyl-oligosaccharide 1,2- $\alpha$ -mannosidase activity, possibly involved in glycoprotein  
214 modification. Twelve additional pairs contained known protein domains (two Zinc finger domains,  
215 one TIP49 domain, one DnaI domain, one NADH-ubiquinone oxidoreductase domain, one SWAP  
216 domain, and six ankyrin repeat domains). Ankyrin repeat domains were significantly over-  
217 represented among the genes under positive selection ( $p < 0.05$ , Fisher exact test), and the  
218 corresponding genes were manually examined by best reciprocal blast search to ensure that they  
219 corresponded to true orthologs. Only one pair was part of a protein family that had undergone recent  
220 expansion (Ec-27\_003170, EsuBft1157\_2), and in this case phylogenetic analysis including the other  
221 members of the family (EsuBft255\_4, EsuBft2264\_2, Ec-05\_004510, Ec-08\_002010) showed Ec-  
222 27\_003170 and EsuBft1157\_2 to form a branch with 100% bootstrap support (data not shown). The  
223 remaining 70 pairs of proteins had entirely unknown functions, although four genes were located in  
224 the pseudoautosomal region of the sex chromosome of *Ectocarpus* sp. Ec32. Out of the 83 genes  
225 under positive selection 72 were found only in brown algae and another four only in stramenopiles  
226 (e-value cutoff of  $1e-10$  against the nr database). They can thus be considered as taxonomically  
227 restricted genes. Furthermore, 75 of these genes were expressed in at least one of the two  
228 *Ectocarpus* species, and only 10 of the 83 genes encoded short proteins with less than 100 amino  
229 acid residues, suggesting that the majority of these genes may be functional. None of them were  
230 highly variable, as indicated by the fact that the dN/dS ratio exhibited a weak negative correlation  
231 with the rate of synonymous mutations dS (Pearson Correlation coefficient  $r=-0.05$ ,  $p < 0.001$ ; Figure  
232 4). This suggests that the split of *Ectocarpus* sp. Ec32 and *E. subulatus* was the result of allopatric  
233 separation with subsequent speciation due to gradual adaptation to the local environment. Indeed,  
234 in cases of sympatric or parapatric speciation, genes under positive selection are predominant  
235 among rapidly evolving genes (Swanson and Vacquier, 2002). There was no trend for positively  
236 selected genes to be located in specific regions of the genome (dispersion index of genes under  
237 positive selection close to a random distribution with values ranging between 0.7 and 0.8 depending  
238 on the window size).

### 239 **Manual examination of lineage-specific and of expanded genes and gene families**

240 The focus of our work is on the genes specific to and expanded in *E. subulatus* and we only give a  
241 brief overview of the situation regarding *Ectocarpus* sp. Ec32. It is important to consider that the *E.*  
242 *subulatus* Bft15b genome is likely to be less complete than the Ec32 genome, which has been curated  
243 and improved for over 10 years now (Cormier *et al.*, 2017). Hence, regarding genes that are present  
244 in Ec32 but absent in Bft15b, it is difficult to distinguish between the effects of a potentially  
245 incomplete genome assembly and true gene losses in Bft15b. To further reduce this bias during the  
246 manual examination of lineage-specific genes, the list of genes to be examined was reduced by  
247 additional restrictions. First, only genes that did not have orthologs in *S. japonica* were considered.

248 This eliminated several predicted proteins that may have appeared to be lineage-specific due to  
249 incomplete genome sequencing, but also proteins that have been recently lost in one of the  
250 *Ectocarpus* species. Secondly, the effect of possible differences in gene prediction, notably the  
251 manual removal of monoexonic gene models in *Ectocarpus* sp. Ec32, was minimized by including an  
252 additional validation step: only proteins without corresponding nucleotide sequences (tblastn, e-  
253 value < 1e-10) in the other *Ectocarpus* genome were considered for manual examination. Thirdly,  
254 only proteins with a length of at least 50 aa were retained. This reduced the number of lineage-  
255 specific proteins to be considered in strain Bft15b to 1,629, and in strain Ec32 to 689 (Supporting  
256 Information Table S5).

257 In *E. subulatus*, among the 1,629 lineage-specific genes, 1,436 genes had no homologs (e-value < 1e-  
258 5) in the UniProt database: they are thus truly lineage-specific and have unknown functions. Among  
259 the remaining 193 genes, 145 had hits (e-value < 1e-5) in *Ectocarpus* sp. Ec32. The majority  
260 corresponds to multi-copy genes that had diverged prior to the separation of *Ectocarpus* and *S.*  
261 *japonica*, and for which the *Ectocarpus* sp. Ec32 and *S. japonica* orthologs were probably lost. The  
262 remaining 48 genes were manually examined (genetic context, GC content, EST coverage); 18 of  
263 them corresponded to probable bacterial contaminations and the corresponding scaffolds were  
264 removed. Finally, the remaining 30 genes were manually annotated and classified: 13 had homology  
265 only with uncharacterized proteins or were too dissimilar from characterized proteins to deduce  
266 hypothetical functions; another eight probably corresponded to short viral sequences integrated into  
267 the algal genome (EsuBft1730\_2, EsuBft4066\_3, EsuBft4066\_2, EsuBft284\_15, EsuBft43\_11,  
268 EsuBft551\_12, EsuBft1883\_2, EsuBft4066\_4), and one (EsuBft543\_9) was related to a  
269 retrotransposon. Two adjacent genes (EsuBft1157\_4, EsuBft1157\_5) were also found in diatoms and  
270 may be related to the degradation of cellobiose and the transport of the corresponding sugars.  
271 Furthermore, two genes, EsuBft1440\_3 and EsuBft1337\_8, contained conserved motifs (IPR023307  
272 and SSF56973) typically found in toxin families. Finally, two additional proteins, EsuBft36\_20 and  
273 EsuBft440\_20, consisted almost exclusively of short repeated sequences of unknown function  
274 (“ALEW” and “GAAASGVAGGAVVNG”, respectively).

275 In *Ectocarpus* sp. Ec32, 97 proteins corresponded to the *E. siliculosus* virus-1 inserted into the Ec32  
276 genome – no similar insertion was detected in *E. subulatus*. The large majority of proteins (511)  
277 corresponded to proteins of unknown function without matches in public databases. The remaining  
278 81 proteins were generally poorly annotated, usually only via the presence of a domain. Examples  
279 are ankyrin repeat-containing domain proteins (12), Zinc finger domain proteins (6), proteins  
280 containing wall sensing component (WSC) domains (3), protein kinase-like proteins (3), and Notch  
281 domain proteins (2) (see Supporting Information Table S5).

282 Regarding expanded gene families, OrthoFinder indicated 232 clusters of orthologous genes  
283 (corresponding to 4,064 proteins) expanded in the genome of *E. subulatus*, and 450 expanded in  
284 *Ectocarpus* sp. Ec32 (corresponding to 1,685 proteins; Supporting Information Table S5). Manual  
285 examination of the *E. subulatus* expanded gene clusters revealed 48 of them (2,623 proteins) to be  
286 false positives, which can be explained essentially by split gene models or gene models associated  
287 with transposable elements predicted in the *E. subulatus* but not in the *Ectocarpus* sp. Ec32 genome.



288 The remaining 184 clusters (1,441 proteins) corresponded to proteins with unknown function (139  
289 clusters, 1,064 proteins), 98% of which were found only in both *Ectocarpus* genomes. Furthermore,  
290 nine clusters (202 proteins) represented sequences related to transposons predicted in both  
291 genomes, and eight clusters (31 proteins) were similar to known viral sequences. Only 28 clusters  
292 (135 proteins) could be roughly assigned to biological functions (Table 2). They comprised proteins  
293 potentially involved in modification of the cell-wall structure (including sulfation), in transcriptional  
294 regulation and translation, in cell-cell communication and signaling, as well as a few stress response  
295 proteins, notably a set of HSP20s, and several proteins of the light-harvesting complex (LHC)  
296 potentially involved in non-photochemical quenching.

297 Among the most striking examples of expansion in *Ectocarpus* sp. Ec32, we found different families  
298 of serine-threonine protein kinase domain proteins present in 16 to 25 copies in Ec32 compared to  
299 only 5 or 6 (numbers of different families) in *E. subulatus*, Kinesin light chain-like proteins (34 vs. 13  
300 copies), two clusters of Notch region containing proteins (11 and 8 vs. 2 and 1 copies), a family of  
301 unknown WSC domain containing proteins (8 copies vs. 1), putative regulators of G-protein signaling  
302 (11 vs. 4 copies), as well as several expanded clusters of unknown and of viral proteins.

### 303 **Targeted manual annotation of specific pathways**

304 Based on the results of automatic analysis but also on literature studies of genes that may be able to  
305 explain physiological differences between *E. subulatus* and *Ectocarpus* sp. Ec32, several gene families  
306 and pathways were manually examined and annotated.

### 307 **Cell wall metabolism**

308 Cell walls are key components of both plants and algae and, as a first barrier to the surrounding  
309 environment, important for many processes including development and the acclimation to  
310 environmental changes. Synthesis and degradation of cell wall oligo- and polysaccharides is  
311 facilitated by carbohydrate-active enzymes (CAZymes) (<http://www.cazy.org/>; Cantarel et al. 2009).  
312 These comprise several families including glycoside hydrolases (GHs) and polysaccharide lyases (PLs),  
313 both involved in the cleavage of glycosidic linkages, glycosyltransferases (GTs), which create  
314 glycosidic linkages, and additional enzymes such as the carbohydrate esterases (CEs) which remove  
315 methyl or acetyl groups from substituted polysaccharides.

316 The genome of the brown alga *E. subulatus* encodes 37 GHs (belonging to 17 GH families), 94 GTs  
317 (belonging to 28 GT families), nine sulfatases (family S1-2), and 13 sulfotransferases, but lacks genes  
318 homologous to known PLs and CEs (Figure 5). In particular, the consistent lack of known alginate  
319 lyases and cellulases in the *E. subulatus* and the other brown algal genomes suggests that other, yet  
320 unknown genes, may be responsible for cell wall modifications during development. Overall, the  
321 gene content of *E. subulatus* is similar to *Ectocarpus* sp. Ec32 and *S. japonica* in terms of the number  
322 of CAZY families, but slightly lower in terms of absolute gene number (Cock, et al. 2010; Ye et al.  
323 2015; Figure 5). Especially *S. japonica* features an expansion of certain CAZY families probably related  
324 to the establishment of more complex tissues in this kelp (*i.e.* 82 GHs belonging to 17 GH families,  
325 131 GTs belonging to 31 GT families).

326 *E. subulatus* is frequently found in brackish- and even freshwater environments (West and Kraft,  
327 1996) where its cell wall exhibits little or no sulfation (Torode et al., 2015). Hence, we also assessed

328 whether *E. subulatus* had reduced the gene families responsible for this process. Its genome encodes  
329 only eight sulfatases and six sulfotransferases compared to ten and seven, respectively, in *Ectocarpus*  
330 sp. Ec32. We also documented variations in the GT families, some being present in one or two of the  
331 brown algal genomes considered, while absent in other(s) (e.g. GH30, GT15, GT18, GT24, GT25,  
332 GT28, GT50, GT54, GT65, GT66, GT74, GT77). However, as gene numbers for these families are very  
333 low (e.g. the GT24 family has one member in *Ectocarpus* sp. Ec32, two in *E. subulatus*, and none in *S.*  
334 *japonica*), the results must be taken with caution. Finally, *Ectocarpus* sp. Ec32 has previously been  
335 reported to possess numerous proteins with WSC domains (Cock *et al.*, 2010; Michel *et al.*, 2010).  
336 These were initially found in yeasts (Verna *et al.*, 1997) where they act as cell surface  
337 mechanosensors and activate the intracellular cell wall integrity signaling cascade in response to  
338 hypo-osmotic shock (Gualtieri *et al.*, 2004). In brown algae, these WSC domains may also regulate  
339 wall rigidity, through the control of the activity of appended enzymes, such as mannuronan C5-  
340 epimerases, which act on alginates (Hervé *et al.*, 2016). Surprisingly, the total number of WSC  
341 domains is reduced in *E. subulatus* compared to *Ectocarpus* sp. Ec32 with around 320 vs. 444  
342 domains, respectively, based on InterProScan (Supporting Information Table S2). Additional  
343 information regarding *E. subulatus* CAZymes can be found in Supporting Information File S1.

#### 344 **Central and storage carbohydrate metabolism**

345 A characteristic feature of brown algae is that they store carbohydrates not as glycogen or starch,  
346 like most animals and plants, but as laminarin (Read *et al.*, 1996). Brown algae also have the  
347 particularity of using the photoassimilate D-fructose 6-phosphate to produce the alcohol sugar D-  
348 mannitol instead of sucrose like land plants. The *E. subulatus* genome contains similar sets of genes  
349 for carbon storage compared to *Ectocarpus* sp. Ec32: all the genes encoding enzymes involved in  
350 sucrose metabolism and starch biosynthesis are completely absent while all genes necessary for  
351 trehalose synthesis, as well as laminarin synthesis and recycling were found. Also, three copies of  
352 M1PDH genes were found in both *Ectocarpus* species compared to two in *S. japonica*, probably due  
353 to a recent duplication of M1PDH1/M1PDH2 in the Ectocarpales (Tonon *et al.*, 2017) (Supporting  
354 Information File S1).

#### 355 **Sterol metabolism**

356 Sterols are important modulators of membrane fluidity among eukaryotes, and provide the  
357 backbone for signaling molecules (Desmond and Gribaldo, 2009). Fucosterol, cholesterol, and  
358 ergosterol are the most abundant sterols in *Ectocarpus* sp. Ec32, where their relative abundance  
359 varies according to sex and temperature (Mikami *et al.*, 2018). All three molecules are thought to be  
360 synthesized from squalene by a succession of 12 to 14 steps, relying on a roughly conserved set of  
361 twelve enzymes (Desmond and Gribaldo, 2009). The *E. subulatus* and *Ectocarpus* sp. Ec32 genomes  
362 each encode homologs of twelve of them (SQE, CAS, CYP51, FK, SMO, HSD3B, EBP, CPI1, DHCR7,  
363 SC5DL, and two SMTs). The remaining two, a delta-24-reductase (DHCR24) and a C22 desaturase  
364 (CYP710), were probably lost secondarily. In land plants, these latter enzymes are involved in the two  
365 steps transforming fucosterol into stigmasterol. Fucosterol is the main sterol in brown algae, and  
366 provides a substrate for saringosterol, a brown-alga specific C24-hydroxylated fucosterol-derivative  
367 with antibacterial activity (Wächter *et al.*, 2001).

## 368 **Algal defense: metabolism of phenolics and halogens**

369 Polyphenols are a group of defense compounds in brown algae that are likely to be important both  
370 for abiotic (Pavia *et al.*, 1997) and biotic stress tolerance (Geiselman and McConnell, 1981). Brown  
371 algae produce specific polyphenols called phlorotannins, which are analogous to land plant tannins.  
372 These products are polymers of phloroglucinol, which are synthesized via the activity of a  
373 phloroglucinol synthase, a type III polyketide synthase characterized in *Ectocarpus* sp. Ec32 (Meslet-  
374 Cladière *et al.*, 2013). In analogy to the flavonoid pathway of land plants, the further metabolism of  
375 phlorotannins is thought to be driven by members of chalcone isomerase-like (CHIL), aryl  
376 sulfotransferase (AST), flavonoid glucosyltransferase (FGT), flavonoid O-methyltransferase (OMT),  
377 polyphenol oxidase (POX), and tyrosinase (TYR) families (Cock *et al.*, 2010). While copy numbers  
378 between the two *Ectocarpus* species and *S. japonica* are identical for PKS III, CHIL, FGT, OMT and  
379 POX, *E. subulatus* encodes fewer ASTs and TYRs (Figure 5). In the case of ASTs, this may be related to  
380 the lower concentration of sulfate in low salinity environments frequently colonized by *E. subulatus*.

381 A second important and original defense mechanism in brown algae is the production of halogenated  
382 compounds via the activity of halogenating enzymes, *e.g.* the vanadium-dependent haloperoxidase  
383 (vHPO). While *S. japonica* has recently been reported to possess 17 potential bromoperoxidases  
384 (vBPO) and 59 putative iodoperoxidases (vIPO) (Ye *et al.*, 2015), *Ectocarpus* sp. Ec32 and *E. subulatus*  
385 possess only a single vBPO each and no vIPO, but have in turn slightly expanded a haloperoxidase  
386 family closer to vHPO characterized in several marine bacteria (Fournier *et al.*, 2014) (Figure 5). One  
387 difference between the two *Ectocarpus* species is that *E. subulatus* Bft15b possesses only three vHPO  
388 genes compared to the five copies found in the genome of Ec32. In addition, homologs of thyroid  
389 peroxidases (TPOs) may also be involved in halide transfer and stress response. Again, Ec32 and  
390 Bft15b show a reduced set of these genes compared to *S. japonica*, and Ec32 contains more copies  
391 than Bft15b. Finally, a single haloalkane dehalogenase (HLD) was found exclusively in *Ectocarpus* sp.  
392 Ec32.

## 393 **Transporters**

394 Transporters are key actors driving salinity tolerance in terrestrial plants (Volkov, 2015). We  
395 therefore carefully assessed potential differences in this group of proteins that may explain  
396 physiological differences between Ec32 and Bft15b based on the five main categories of transporters  
397 described in the Transporter Classification Database (TCDB) (Saier *et al.*, 2016): channels/pores,  
398 electrochemical potential-driven transporters, primary active transporters, group translocators, and  
399 transmembrane electron carriers. A total of 292 genes were identified in *E. subulatus* (Supporting  
400 Information Table S1). They consist mainly of transporters belonging to the three first categories  
401 listed above. All 27 annotated transporters of the channels/pores category belong to the alpha-type  
402 channel (1.A.) and are likely to be involved in movements of solutes by energy-independent  
403 processes. One hundred and forty-five proteins were found to correspond to the second category  
404 (electrochemical potential-driven transporters) containing transporters using a carrier-mediated  
405 process to catalyze uniport, antiport, or symport. The most represented superfamilies are APC  
406 (Amino Acid-Polyamine-Organocation, 24), DMT (Drug/Metabolite Transporter, 16), MFS (Major  
407 Facilitator Superfamily, 32), and MC (Mitochondrial Carrier, 34). Primary active transporters (third

408 category) use a primary source of energy to drive the active transport of a solute against a  
409 concentration gradient. Eighty proteins representing this category were found in the *E. subulatus*  
410 genome, including 59 ABC transporters and 15 belonging to the P-type ATPase superfamily. No  
411 homologs of group translocators or transmembrane electron carriers were identified, but 14  
412 transporters were classified as category 9, which is poorly characterized. A 1:1 ratio of orthologous  
413 genes coding for all of the transporters described above was observed between both *Ectocarpus*  
414 genomes, except for EsuBft583\_3, an anion-transporting ATPase, which is also present in diatoms  
415 and *S. japonica*, but may have been recently lost in *Ectocarpus* sp. Ec32.

#### 416 **Abiotic stress-related genes**

417 Reactive oxygen species (ROS) scavenging enzymes, including ascorbate peroxidases, superoxide  
418 dismutases, catalases, catalase peroxidases, glutathione reductases, (mono)dehydroascorbate  
419 reductases, and glutathione peroxidases are important for the redox equilibrium of organisms (see  
420 Das and Roychoudhury 2014 for a review). An increased reactive oxygen scavenging capacity has  
421 been correlated with stress tolerance in brown algae (Collén and Davison, 1999). In the same vein,  
422 chaperone proteins including heat shock proteins (HSPs), calnexin, calreticulin, T-complex proteins,  
423 and tubulin-folding co-factors are important for protein re-folding under stress. The transcription of  
424 these genes is very dynamic and generally increases in response to stress in brown algae (Roeder *et*  
425 *al.*, 2005; Mota *et al.*, 2015). In total, 104 genes encoding members of the protein families listed  
426 above were manually annotated in the *E. subulatus* Bft15b genome (Supporting Information Table  
427 1). However, with the exception of HSP20 proteins which were present in three copies in Bft15b vs.  
428 one copy in Ec32 and had already been identified in the automatic analysis, no clear difference in  
429 gene number was observed between the two *Ectocarpus* species.

430 Different families of chlorophyll-binding proteins (CBPs), such as the LI818/LHCX family, have been  
431 suspected to be involved in non-photochemical quenching (Peers *et al.*, 2009). CBPs have been  
432 reported to be up-regulated in response to abiotic stress in stramenopiles (*e.g.* Zhu and Green 2010;  
433 Dong *et al.* 2016), including *Ectocarpus* (Dittami *et al.*, 2009), probably as a way to deal with excess  
434 light energy when photosynthesis is affected. They have also previously been shown to be among  
435 the most variable functional groups of genes between *Ectocarpus* sp. Ec32 and *E. subulatus* by  
436 comparative genome hybridization experiments (Dittami *et al.*, 2011). We have added the putative  
437 *E. subulatus* CBPs to a previous phylogeny of *Ectocarpus* sp. Ec32 CBPs (Dittami *et al.*, 2010) and  
438 found both a small group of LHCX CBPs as well as a larger group belonging to the LHCF/LHCR family  
439 that have probably undergone a recent expansion (Figure 6). Although some of the proteins  
440 appeared to be truncated (marked with asterisks), all of them were associated with at least some  
441 RNA-seq reads, suggesting that they may be functional. A number of LHCR family proteins were also  
442 flanked by LTR-like sequences as predicted by the LTR-harvest pipeline (Ellinghaus *et al.*, 2008).

#### 443 **Discussion**

444 Here we present the draft genome and metabolic network of *E. subulatus* strain Bft15b, a brown alga  
445 which, compared to *Ectocarpus* sp. Ec32, is characterized by high abiotic stress tolerance (Bolton,  
446 1983; Peters *et al.*, 2015). Based on time-calibrated molecular trees, both species separated roughly

447 16 Mya (Dittami *et al.*, 2012), *i.e.* slightly before *e.g.* the split between *Arabidopsis thaliana* and  
448 *Thellungiella salsuginea* 7-12 Mya (Wu *et al.*, 2012). According to our analysis, the split between  
449 *Ectocarpus* sp. Ec32 and *E. subulatus* was probably due to allopatric separation with subsequent  
450 adaptation of *E. subulatus* to highly fluctuating and low salinity habitats leading to speciation.

### 451 **Genome evolution of *Ectocarpus* species driven by transposons and viruses**

452 Compared to the extremophile plant models *T. salsuginea* or *Arabidopsis lyrata* which have almost  
453 doubled in genome size with respect to *A. thaliana*, the *E. subulatus* genome is only approximately  
454 23% larger than that of *Ectocarpus* sp. Ec32. In *T. salsuginea* and *A. lyrata*, the observed expansion  
455 was attributed mainly to the activity of transposons (Wu *et al.*, 2012; Hu *et al.*, 2011). In the case of  
456 *Ectocarpus*, we also observed traces of recent transposon activity, especially from LTR transposons,  
457 which is in line with the absence of DNA methylation, and bursts in transposon activity have indeed  
458 been identified as one potential driver of local adaptation and speciation in other model systems  
459 such as salmon (de Boer *et al.*, 2007). Furthermore, LTRs are known to mediate the  
460 retrotransposition of individual genes, leading to the duplication of the latter (Tan *et al.*, 2016). In  
461 the *E. subulatus* genome, only a few cases of gene duplication were observed since the separation  
462 from *Ectocarpus* sp. Ec32, and in most of them no indication of the involvement of LTRs was found.  
463 The only exception was a recent expansion of the LHCR family, in which proteins were flanked by a  
464 pair of LTR-like sequences. These elements lacked both the group antigen (GAG) and reverse  
465 transcriptase (POL) proteins, which implies that, if retro-transposition was the mechanism underlying  
466 the expansion of this group of proteins, it would have depended on other active transposable  
467 elements to provide these activities.

468 The second major factor that impacted the *Ectocarpus* genomes were viruses. Viral infections are a  
469 common phenomenon in Ectocarpales (Müller *et al.*, 1998), and a well-studied example is the  
470 *Ectocarpus siliculosus* virus-1 (EsV-1) (Delaroque *et al.*, 2001). It was found to be present latently in  
471 host cells of several strains of *Ectocarpus* sp. closely related to strain Ec32, and has also been found  
472 integrated in the genome of the latter strain, although it is not expressed (Cock *et al.*, 2010). As  
473 previously indicated by comparative genome hybridization experiments (Dittami *et al.*, 2011), the *E.*  
474 *subulatus* genome does not contain a complete EsV-1 like insertion, although a few shorter EsV-1-  
475 like proteins were found. Thus, the EsV-1 integration observed in *Ectocarpus* sp. Ec32 has likely  
476 occurred after the split with *E. subulatus*. This, together with the presence of other viral sequences  
477 specific to *E. subulatus*, indicates that, in addition to transposable elements, viruses have shaped the  
478 *Ectocarpus* genomes over the last 16 million years.

### 479 **Few classical stress response genes but no transporters involved in** 480 **adaptation**

481 A main aim of this study was to identify gene functions that may potentially be responsible for the  
482 high abiotic stress and salinity tolerance of *E. subulatus*. Similar studies on genomic adaptation to  
483 changes in salinity or to drought in terrestrial plants have previously highlighted genes generally  
484 involved in stress tolerance to be expanded in “extremophile” organisms. Examples are the  
485 expansion of catalase, glutathione reductase, and heat shock protein families in desert poplar (Ma



486 *et al.*, 2013), arginine metabolism in jujube (Liu *et al.*, 2014), or genes related to cation transport,  
487 abscisic acid signaling, and wax production in *T. salsuginea* (Wu *et al.*, 2012). In our study, we found  
488 a few genomic differences that match these expectations. *E. subulatus* possesses two additional  
489 HSP20 proteins and has an expanded family of CBPs probably involved in non-photochemical  
490 quenching, which may contribute to its high stress tolerance. It also has a slightly reduced set of  
491 genes involved in the production of halogenated defense compounds which may be related to its  
492 habitat preference: *E. subulatus* is frequently found in brackish and even freshwater environments  
493 with low availability of halogens. It also specializes in highly abiotic stressful habitats for brown algae  
494 and may thus invest less energy in halogen-based defense.

495 Another anticipated adaptation to life in varying salinities lies in modifications of the cell wall.  
496 Notably, the content of sulfated polysaccharides is expected to play a crucial role as these  
497 compounds are present in all marine plants and algae, but absent in their freshwater relatives  
498 (Kloareg and Quatrano, 1988; Popper *et al.*, 2011). The fact that we found only small differences in  
499 the number of encoded sulfatases and sulfotransferases indicates that the absence of sulfated cell-  
500 wall polysaccharides previously observed in *E. subulatus* in low salinities (Torode *et al.*, 2015) is  
501 probably a regulatory effect or simply related to the availability of sulfate depending on the salinity.  
502 This is also coherent with the wide distribution of *E. subulatus*, which comprises marine, brackish  
503 water, and freshwater environments.

504 Finally, transporters have previously been described as a key element in plant adaptation to different  
505 salinities (see Rao *et al.*, 2016 for a review). Similar results have also been obtained for *Ectocarpus* in  
506 a study of quantitative trait loci (QTLs) associated with salinity and temperature tolerance (Avia *et al.*,  
507 2017). In our study, however, we found no indication of genomic differences related to  
508 transporters between the two species. This observation corresponds to previous physiological  
509 experiments indicating that *Ectocarpus*, unlike many terrestrial plants, responds to strong changes  
510 in salinity as an osmoconformer rather than an osmoregulator, *i.e.* it allows the intracellular salt  
511 concentration to adjust to values close to the external medium rather than keeping the intracellular  
512 ion composition constant (Dittami *et al.*, 2009).

### 513 **Genes related to cell-cell communication are under positive selection**

514 In addition to genes that may be directly involved in the adaptation to the environment, we found  
515 several gene clusters containing domains potentially involved in cell-cell signaling that were  
516 expanded in the *Ectocarpus* sp. Ec32 genome (Table 2), notably a family of ankyrin repeat-containing  
517 domain proteins (Mosavi *et al.*, 2004) was more abundant in Ec32. Furthermore, we identified six  
518 ankyrin repeat-containing domain proteins among the genes under positive selection between the  
519 two species. The exact function of these proteins, however, is still unknown. The only well-annotated  
520 gene under positive selection, a mannosyl-oligosaccharide 1,2- $\alpha$ -mannosidase, is probably  
521 involved in the modification of glycoproteins which are also important for cell-cell interactions  
522 (Tulsiani *et al.*, 1982). Although these genes are not rapidly evolving in *Ectocarpus*, these observed  
523 differences may be, in part, responsible for the existing pre-zygotic reproductive barrier between the  
524 two examined species of *Ectocarpus* (Lipinska *et al.*, 2016).



## 525 **Genes of unknown function and lineage-specific genes are likely to play a** 526 **dominant role in adaptation**

527 Despite the gene functions identified as potentially involved in adaptation and speciation above, it is  
528 important to keep in mind that the vast majority of genomic differences between the two species of  
529 *Ectocarpus* corresponds to proteins of entirely unknown functions. Among the 83 gene pairs under  
530 positive selection, 84% were also entirely unknown, and 92% represented genes taxonomically  
531 restricted to brown algae. In addition, we identified 1,629 lineage-specific genes, of which 88% were  
532 entirely unknown. These genes were for the most part expressed and are thus likely to correspond  
533 to true genes. For the lineage-specific genes, their absence from the *Ectocarpus* sp. Ec32 and *S.*  
534 *japonica* genomes was also confirmed on the nucleotide level. A large part of the mechanisms that  
535 underlie the adaptation to different ecological niches in *Ectocarpus* may, therefore, lie in these genes  
536 of unknown function. This can be explained in part by the fact that still only few brown algal genomes  
537 are available and that currently most of our knowledge on the functions of their proteins is based on  
538 studies in model plants, animals, yeast, or bacteria. Brown algae, however, are part of the  
539 stramenopile lineage that has evolved independently from the former for over 1 billion years (Yoon  
540 *et al.*, 2004). They differ from land plants even in otherwise highly conserved aspects, for instance in  
541 their life cycles, their cell walls, and their primary metabolism (Charrier *et al.*, 2008). Furthermore,  
542 substantial contributions of lineage-specific genes to the evolution of organisms and the  
543 development of innovations have also been described for animal models (see Tautz and Domazet-  
544 Lošo, 2011 for a review) and studies in basal metazoans furthermore indicate that they are essential  
545 for species-specific adaptive processes (Khalturin *et al.*, 2009).

546 Despite the probable importance of unknown and lineage-specific genes for local adaptation,  
547 *Ectocarpus* may still heavily rely on classical stress response genes for abiotic stress tolerance. Many  
548 of the gene families known to be related to stress response in land plants (including transporters and  
549 genes involved in cell wall modification) for which no significant differences in gene contents were  
550 observed, have previously been reported to be strongly regulated in response to environmental  
551 stress in *Ectocarpus* (Dittami *et al.*, 2009; Dittami *et al.*, 2012; Ritter *et al.*, 2014). This high  
552 transcriptomic plasticity is probably one of the features that allow *Ectocarpus* to thrive in a wide  
553 range of environments and may form the basis for its capacity to further adapt to “extreme  
554 environments” such as freshwater (West and Kraft, 1996).

## 555 **Conclusion and future work**

556 We have shown that *E. subulatus* has separated from *Ectocarpus* sp. Ec32 probably via a mechanism  
557 of allopatric speciation. Its genome has since been shaped mainly by the activity of viruses and  
558 transposons, particularly large retrotransposons. Over this period of time, *E. subulatus* has adapted  
559 to environments with high abiotic variability including brackish water and even freshwater. We have  
560 identified a number of genes that likely contribute to this adaptation, including HSPs, CBPs, a  
561 reduction of genes involved in halogenated defense compounds, or some changes in cell wall  
562 polysaccharide modifying enzymes. However, the vast majority of genes that differ between the two  
563 examined *Ectocarpus* species or that have recently been under positive selection are lineage-specific  
564 and encode proteins of unknown function. This underlines the fundamental differences that exist

565 between brown algae and terrestrial plants or other lineages of algae. Studies as the present one,  
566 *i.e.* without strong *a priori* assumptions about the mechanisms involved in adaptation, are therefore  
567 essential to start elucidating the specificities of this lineage as well as the various functions of the  
568 unknown genes. Finally, *E. subulatus* has become an important brown algal model to study the role  
569 of algal-bacterial interactions in response to environmental changes. This is due mainly to its  
570 dependence on specific bacterial taxa for freshwater tolerance (KleinJan *et al.*, 2017; Dittami *et al.*,  
571 2016). The presented algal genome and metabolic network are indispensable tools in this context as  
572 well, as they will allow for the separation of algal and bacterial responses in culture experiments, and  
573 facilitate the implementation of global approaches based on the use of metabolic network  
574 reconstructions (Dittami *et al.*, 2014; Levy *et al.*, 2015).

## 575 **Materials and Methods**

576 **Biological material.** Haploid male parthenosporophytes of *E. subulatus* strain Bft15b (Culture  
577 Collection of Algae and Protozoa CCAP accession 1310/34), isolated in 1978 by Dieter G. Müller in  
578 Beaufort, North Carolina, USA, were grown in 14 cm (ca. 100 ml) Petri Dishes in Provasoli-enriched  
579 seawater (Starr and Zeikus, 1993) under a 14/10 daylight cycle at 14°C. Approximately 1 g fresh  
580 weight of algal culture was dried on a paper towel and immediately frozen in liquid nitrogen. For  
581 RNA-seq experiments, in addition to Bft15b, a second strain, the diploid freshwater strain CCAP  
582 1310/196 isolated from Hopkins River Falls, Australia (West and Kraft, 1996), was included. One  
583 culture was grown as described above for Bft15b, and for a second culture, seawater was diluted 20-  
584 fold with distilled water prior to the addition of Provasoli nutrients (Dittami *et al.*, 2012).

585 **Flow cytometry** experiments to measure nuclear DNA contents were carried out as described  
586 (Bothwell *et al.*, 2010), except that young sporophyte tissue was used instead of gametes. Samples  
587 of the genome-sequenced *Ectocarpus* sp. strain Ec32 (CCAP accession 1310/4 from San Juan de  
588 Marcona, Peru), were run in parallel as a size reference.

589 **Nucleic acid extraction and sequencing.** DNA and RNA were extracted using a phenol-chloroform-  
590 based method according to Le Bail *et al.* (2008). For DNA sequencing, four Illumina libraries were  
591 prepared and sequenced on a HiSeq 2000: one paired-end library (Illumina TruSeq DNA PCR-free LT  
592 Sample Prep kit #15036187, sequenced with 2x100 bp read length), and three mate-pair libraries  
593 with span sizes of 3kb, 5kb, and 10kb respectively (Nextera Mate Pair Sample Preparation Kit;  
594 sequenced with 2x50bp read length). One poly-A enriched RNA-seq library was generated for each  
595 of the three aforementioned cultures according to the Illumina TruSeq Stranded mRNA Sample Prep  
596 kit #15031047 protocol and sequenced with 2x50 bp read length.

597 **Methylation.** The degree of DNA methylation was examined by HPLC on CsCl-gradient purified DNA  
598 (Le Bail *et al.*, 2008) from three independent cultures per strain as previously described (Rival *et al.*,  
599 2013).

600 **Sequence assembly.** Redundancy of mate pairs (MPs) was reduced by mapping MPs to a preliminary  
601 assembly, to mitigate the negative effect of redundant chimeric MPs during scaffolding. Clean DNA

602 reads were assembled using SOAPDenovo2 (Luo *et al.*, 2012). Scaffolding was then carried out using  
603 SSPACE basic 2.0 (Boetzer *et al.*, 2011) (trim length up to 5 bases, min 3 links to scaffold contigs, min  
604 15 reads to call a base during an extension) followed by a run of GapCloser (part of the SOAPDenovo  
605 package, default settings). Alternative assemblers (CLC and Velvet) were also tested but yielded  
606 significantly lower final contig and scaffold lengths. RNA-seq reads were cleaned using Trimmomatic  
607 (default settings), first assembled *de novo* using Trinity 2.1.1 (Grabherr *et al.*, 2011) and filtered by  
608 coverage with an FPKM cutoff of 1. Later, a second genome-guided assembly was performed with  
609 Tophat2 and with Cufflinks.

610 **Removal of bacterial sequences:** As cultures were not treated with antibiotics prior to DNA  
611 extraction, bacterial scaffolds were removed from the final assembly using the taxoblast pipeline  
612 (Dittami and Corre, 2017). Every scaffold was cut into fragments of 500 bp, and these fragments were  
613 aligned (blastn, e-value cutoff 0.01) against the GenBank non-redundant nucleotide (nt) database.  
614 Scaffolds for which more than 90% of their 500 bp-fragments had bacterial sequences as best blast  
615 hits were removed from the assembly (varying this threshold between 30 and 95% resulted in only  
616 very minor differences in the final assembly). “Bacterial” scaffolds were submitted to the MG-Rast  
617 server to obtain an overview of the taxa present in the sample (Meyer *et al.*, 2008).

618 **Repeated elements** were searched for *de novo* using TEdenovo and annotated using TEannot with  
619 default parameters. Both tools are part of the REPET pipeline (Flutre *et al.*, 2011), of which version  
620 2.5 was used for our dataset.

621 **Assessment of genome completeness:** BUSCO 2.0 analyses (Simão *et al.*, 2015) were run on the  
622 servers of the IPlant Collaborative (Goff *et al.*, 2011) with the general eukaryote database as a  
623 reference and default parameters. BUSCO internally uses Augustus (Stanke *et al.*, 2004) to predict  
624 protein coding sequences. As the latter tool performed poorly on both *Ectocarpus* strains in  
625 preliminary tests, predicted proteins were used as input instead of DNA sequences.

626 **Organellar genomes**, *i.e.* plastid and mitochondrion, were manually assembled based on scaffolds  
627 416 and 858 respectively, using the published genome of *Ectocarpus* sp. Ec32 as a guide (Delage *et al.*  
628 *et al.*, 2011; Le Corguillé *et al.*, 2009; Cock *et al.*, 2010). In the case of the mitochondrial genome, the  
629 correctness of the manual assembly was verified by PCR where manual and automatic assemblies  
630 diverged. Both organellar genomes were visualized using OrganellarGenomeDRAW (Lohse *et al.*,  
631 2013) and aligned with the *Ectocarpus* sp. Ec32 organelles using Mauve 2.3.1 (Darling *et al.*, 2004).

632 **Gene prediction.** Putative protein-coding sequences were identified using Eugene 4.1c (Foissac *et al.*  
633 *et al.*, 2008). RNA-seq reads were mapped against the assembled genome using GenomeThreader  
634 1.6.5, and all available proteins from the Swiss-Prot database (Dec. 2014) as well as predicted  
635 proteins from the *Ectocarpus* sp. Ec32 genome (Cock *et al.*, 2010) were aligned to the genome using  
636 KLAST (Nguyen and Lavenier, 2009). Both aligned *de novo*-assembled transcripts and proteins were  
637 provided to Eugene for gene prediction, which was run with the parameter set previously optimized  
638 for the *Ectocarpus* sp. Ec32 genome (Cock *et al.*, 2010).

639 **Functional annotation.** Predicted proteins were compared to the Swiss-Prot database by BlastP  
640 search (e-value cutoff  $1e-5$ ), and the results imported to Blast2GO (Götz *et al.*, 2008), which was used  
641 to run InterPro domain searches and automatically annotate proteins with a description, GO  
642 numbers, and EC codes. The genome and all automatic annotations were imported into Apollo (Lee  
643 *et al.*, 2013; Dunn *et al.*, 2017) for manual curation.

644 **Metabolic network reconstruction.** The *E. subulatus* genome-scale metabolic model (GEM)  
645 reconstruction was carried out as previously described by Prigent *et al.* (2014) by merging an  
646 annotation-based reconstruction obtained with Pathway Tools (Karp *et al.*, 2016) and an orthology-  
647 based reconstruction based on the *Arabidopsis thaliana* metabolic network AraGEM (de Oliveira  
648 Da’Molin *et al.*, 2010) using Pantograph (Loira *et al.*, 2015). A final step of gap-filling was then carried  
649 out using the Meneco tool (Prigent *et al.*, 2017). The entire reconstruction pipeline is available via  
650 the AuReMe workspace (Aite *et al.*, 2018; <http://aureme.genouest.org/>). For pathway-based  
651 analyses, pathways that contained only a single reaction or that were less than 50% complete were  
652 not considered.

653 **Genome comparisons.** Functional comparisons of gene contents were based primarily on  
654 orthologous clusters of genes shared with version 2 of the *Ectocarpus* sp. Ec32 genome (Cormier *et al.*,  
655 2017) as well as the *Saccharina japonica* (Areschoug) genome (Ye *et al.*, 2015). They were  
656 determined by the OrthoFinder software version 0.7.1 (Emms and Kelly, 2015). For any predicted  
657 proteins that were not part of a multi-species cluster, we verified the absence in the other two  
658 genomes also by tblastn searches. Proteins without hit (threshold e-value of  $1e-10$ ) were considered  
659 lineage-specific proteins. Blast2GO 3.1 (Götz *et al.*, 2008) was then used to identify significantly  
660 enriched GO terms among the lineage-specific genes or the expanded gene families (Fischer’s exact  
661 test with FDR correction  $FDR < 0.05$ ). In parallel, a manual examination of these genes was carried  
662 out. Furthermore, we compared both *Ectocarpus* genomes with respect to the presence or absence  
663 of Interpro domain annotations. A third approach consisted in identifying clusters of genes that were  
664 expanded in either of the two *Ectocarpus* genomes. All protein families expanded in the *E. subulatus*  
665 genome were manually examined.

666 **Genes under positive selection.** We examined clusters of orthologous genes with one homolog in *E.*  
667 *subulatus* and one in *Ectocarpus* sp. Ec32 to search for genes potentially under positive selection. To  
668 this means, pairwise alignments of protein-coding nucleotide sequences were performed using  
669 TranslatorX (Abascal *et al.*, 2010) and Muscle (Edgar, 2004). The aligning regions were then analyzed  
670 in the yn00 package of PaML4.4 (Yang, 2007), and all proteins with a ratio of non-synonymous to  
671 synonymous mutations ( $dN/dS$ )  $> 1$  were manually examined. The distribution of these genes across  
672 the genome was examined by calculating variance to mean ratios based on window sizes of 50 to  
673 500 genes.

674 **Phylogenetic analyses.** Phylogenetic analyses were carried out for gene families of particular  
675 interest. For chlorophyll-binding proteins (CBPs), reference sequences were obtained from a  
676 previous study (Dittami *et al.*, 2010), and aligned together with *E. subulatus* and *S. japonica* CBPs  
677 using MAFFT (G-INS-i) (Kato *et al.*, 2002). Alignments were then manually curated, conserved

678 positions selected in Jalview (Waterhouse *et al.*, 2009), and maximum likelihood analyses carried out  
679 using PhyML 3.0 (Guindon and Gascuel, 2003), the LG substitution model, 100 bootstrap replicates,  
680 and an estimation of the gamma distribution parameter. The resulting phylogenetic tree was  
681 visualized using MEGA7 (Kumar *et al.*, 2016). The same procedure was also used in the case of  
682 selected Ankyrin Repeat domain-containing proteins.

683 **Data availability:** Raw sequence data (genomic and transcriptomic reads) as well as assembled  
684 scaffolds and predicted proteins and annotations were submitted to the European Nucleotide  
685 Archive (ENA) under project accession number PRJEB25230 using the EMBLmyGFF3 script (Dainat  
686 and Gourlé, 2018). A JBrowse (Skinner *et al.*, 2009) instance comprising the most recent annotations  
687 is available via the server of the Station Biologique de Roscoff ([http://mmo.sb-roscoff.fr/jbrowseEsu/?data=data/public/ectocarpus/subulatus\\_bft](http://mmo.sb-roscoff.fr/jbrowseEsu/?data=data/public/ectocarpus/subulatus_bft)). The reconstructed metabolic  
688 network of *E. subulatus* is available at <http://gem-aureme.irisa.fr/sububftgem>. Additional resources  
689 and annotations including a blast server are available at <http://application.sb-roscoff.fr/project/subulatus/index.html>. The complete set of manual annotations is provided in  
690 Supporting Information Table S1.  
691  
692

## 693 Acknowledgements

694 We would like to thank Philippe Potin, Mark Cock, Susanna Coelho, Florian Maumus, and Olivier  
695 Panaud for helpful discussions, as well as Gwendoline Andres for help setting up the Jbrowse  
696 instance. This work was funded partially by ANR project IDEALG (ANR-10-BTBR-04) “Investissements  
697 d’Avenir, Biotechnologies-Bioressources”, the European Union’s Horizon 2020 research and  
698 innovation Programme under the Marie Skłodowska-Curie grant agreement number 624575 (ALFF),  
699 and the CNRS Momentum call. Sequencing was performed at the Genomics Unit of the Centre for  
700 Genomic Regulation (CRG), Barcelona, Spain.

## 701 References

- 702 **Abascal, F., Zardoya, R. and Telford, M.J.** (2010) TranslatorX: multiple alignment of nucleotide  
703 sequences guided by amino acid translations. *Nucleic Acids Res.*, **38**, W7–W13. Available at:  
704 <https://academic.oup.com/nar/article-lookup/doi/10.1093/nar/gkq291>.
- 705 **Aite, M., Chevallier, M., Frioux, C., et al.** (2018) Traceability, reproducibility and wiki-exploration  
706 for “à-la-carte” reconstructions of genome-scale metabolic models. *PLoS Comput. Biol.*, **in**  
707 **press**.
- 708 **Amtmann, A.** (2009) Learning from evolution: *Theilingiella* generates new knowledge on essential  
709 and critical components of abiotic stress tolerance in plants. *Mol. Plant*, **2**, 3–12. Available at:  
710 <http://www.ncbi.nlm.nih.gov/pubmed/19529830>.
- 711 **Archibald, J.M.** (2009) The puzzle of plastid evolution. *Curr. Biol.*, **19**, R81-8. Available at:  
712 <http://www.ncbi.nlm.nih.gov/pubmed/19174147>.
- 713 **Avia, K., Coelho, S.M., Montecinos, G.J., et al.** (2017) High-density genetic map and identification  
714 of QTLs for responses to temperature and salinity stresses in the model brown alga  
715 *Ectocarpus*. *Sci. Rep.*, **7**, 43241. Available at:  
716 <http://www.ncbi.nlm.nih.gov/pubmed/28256542>.



- 717 **Bail, A. Le, Dittami, S.M., Franco, P.O. de, Rousvoal, S., Cock, J.M., Tonon, T. and Charrier, B.**  
718 (2008) Normalisation genes for expression analyses in the brown alga model *Ectocarpus*  
719 *siliculosus*. *BMC Mol. Biol.*, **9**, 75. Available at: [http://www.biomedcentral.com/1471-](http://www.biomedcentral.com/1471-2199/9/75)  
720 [2199/9/75](http://www.biomedcentral.com/1471-2199/9/75).
- 721 **Boer, J.G. de, Yazawa, R., Davidson, W.S. and Koop, B.F.** (2007) Bursts and horizontal evolution of  
722 DNA transposons in the speciation of pseudotetraploid salmonids. *BMC Genomics*, **8**, 422.  
723 Available at: <http://bmcbgenomics.biomedcentral.com/articles/10.1186/1471-2164-8-422>.
- 724 **Boetzer, M., Henkel, C. V, Jansen, H.J., Butler, D. and Pirovano, W.** (2011) Scaffolding pre-  
725 assembled contigs using SSPACE. *Bioinformatics*, **27**, 578–9. Available at:  
726 <http://www.ncbi.nlm.nih.gov/pubmed/21149342>.
- 727 **Bolton, J.J.** (1983) Ecoclinal variation in *Ectocarpus siliculosus* (Phaeophyceae) with respect to  
728 temperature growth optima and survival limits. *Mar. Biol.*, **73**, 131–138. Available at:  
729 <http://www.springerlink.com/index/10.1007/BF00406880>.
- 730 **Bothwell, J.H., Marie, D., Peters, A.F., Cock, J.M. and Coelho, S.M.** (2010) Role of  
731 endoreduplication and apomeiosis during parthenogenetic reproduction in the model brown  
732 alga *Ectocarpus*. *New Phytol.*, **188**, 111–21. Available at:  
733 <http://www.ncbi.nlm.nih.gov/pubmed/20618911>.
- 734 **Cantarel, B.L., Coutinho, P.M., Rancurel, C., Bernard, T., Lombard, V. and Henrissat, B.** (2009) The  
735 Carbohydrate-Active EnZymes database (CAZy): an expert resource for glycogenomics. *Nucleic*  
736 *Acids Res.*, **37**, D233–D238. Available at: <http://www.ncbi.nlm.nih.gov/pubmed/18838391>.
- 737 **Charrier, B., Coelho, S.M., Bail, A. Le, et al.** (2008) Development and physiology of the brown alga  
738 *Ectocarpus siliculosus*: two centuries of research. *New Phytol.*, **177**, 319–32. Available at:  
739 [http://www.ncbi.nlm.nih.gov/entrez/query.fcgi?cmd=Retrieve&db=PubMed&dopt=Citation&](http://www.ncbi.nlm.nih.gov/entrez/query.fcgi?cmd=Retrieve&db=PubMed&dopt=Citation&ist_uids=18181960)  
740 [ist\\_uids=18181960](http://www.ncbi.nlm.nih.gov/entrez/query.fcgi?cmd=Retrieve&db=PubMed&dopt=Citation&ist_uids=18181960).
- 741 **Cock, J.M., Sterck, L., Rouzé, P., et al.** (2010) The *Ectocarpus* genome and the independent  
742 evolution of multicellularity in brown algae. *Nature*, **465**, 617–21. Available at:  
743 <http://www.ncbi.nlm.nih.gov/pubmed/20520714>.
- 744 **Collén, J. and Davison, I.R.** (1999) Reactive oxygen metabolism in intertidal *Fucus* spp.  
745 (Phaeophyceae). *J. Phycol.*, **35**, 62–69.
- 746 **Corguillé, G. Le, Pearson, G., Valente, M., et al.** (2009) Plastid genomes of two brown algae,  
747 *Ectocarpus siliculosus* and *Fucus vesiculosus*: further insights on the evolution of red-algal  
748 derived plastids. *BMC Evol. Biol.*, **9**, 253. Available at:  
749 <http://bmcevolbiol.biomedcentral.com/articles/10.1186/1471-2148-9-253>.
- 750 **Cormier, A., Avia, K., Sterck, L., et al.** (2017) Re-annotation, improved large-scale assembly and  
751 establishment of a catalogue of noncoding loci for the genome of the model brown alga  
752 *Ectocarpus*. *New Phytol.*, **214**, 219–232. Available at:  
753 <http://doi.wiley.com/10.1111/nph.14321>.
- 754 **Dainat, J. and Gourel, H.** (2018) NBISweden/EMBLmyGFF3: EMBLmyGFF3-1.2.2. *Zenodo*. Available  
755 at: <https://zenodo.org/record/1208446#.WtSToNNubIE>.
- 756 **Darling, A.C.E., Mau, B., Blattner, F.R. and Perna, N.T.** (2004) Mauve: multiple alignment of  
757 conserved genomic sequence with rearrangements. *Genome Res.*, **14**, 1394–1403. Available  
758 at: <http://www.genome.org/cgi/doi/10.1101/gr.2289704>.
- 759 **Das, K. and Roychoudhury, A.** (2014) Reactive oxygen species (ROS) and response of antioxidants  
760 as ROS-scavengers during environmental stress in plants. *Front. Environ. Sci.*, **2**, 53. Available  
761 at: <http://journal.frontiersin.org/article/10.3389/fenvs.2014.00053/abstract>.
- 762 **Dassanayake, M., Oh, D.-H., Haas, J.S., et al.** (2011) The genome of the extremophile crucifer  
763 *Thellungiella parvula*. *Nat. Genet.*, **43**, 913–918. Available at:  
764 <http://dx.doi.org/10.1038/ng.889>.



- 765 **Davison, I.R. and Pearson, G.A.** (1996) Stress tolerance in intertidal seaweeds. *J. Phycol.*, **32**, 197–  
766 211.
- 767 **Delage, L., Leblanc, C., Nyvall Collén, P., Gschloessl, B., Oudot, M.-P., Sterck, L., Poulain, J., Aury,  
768 J.-M. and Cock, J.M.** (2011) In silico survey of the mitochondrial protein uptake and  
769 maturation systems in the brown alga *Ectocarpus siliculosus* E. Newbigin, ed. *PLoS One*, **6**,  
770 e19540. Available at: <http://dx.plos.org/10.1371/journal.pone.0019540>.
- 771 **Delaroque, N., Müller, D.G., Bothe, G., Pohl, T., Knippers, R. and Boland, W.** (2001) The complete  
772 DNA sequence of the *Ectocarpus siliculosus* virus EsV-1 genome. *Virology*, **287**, 112–132.
- 773 **Desmond, E. and Gribaldo, S.** (2009) Phylogenomics of sterol synthesis: insights into the origin,  
774 evolution, and diversity of a key eukaryotic feature. *Genome Biol. Evol.*, **1**, 364–81. Available  
775 at: <http://www.ncbi.nlm.nih.gov/pubmed/20333205>.
- 776 **Dittami, S.M. and Corre, E.** (2017) Detection of bacterial contaminants and hybrid sequences in the  
777 genome of the kelp *Saccharina japonica* using Taxoblast. *PeerJ*, **5**, e4073. Available at:  
778 <https://peerj.com/articles/4073>.
- 779 **Dittami, S.M., Duboscq-Bidot, L., Perennou, M., Gobet, A., Corre, E., Boyen, C. and Tonon, T.**  
780 (2016) Host–microbe interactions as a driver of acclimation to salinity gradients in brown algal  
781 cultures. *ISME J.*, **10**, 51–63. Available at:  
782 <http://www.nature.com/doi/10.1038/ismej.2015.104>.
- 783 **Dittami, S.M., Eveillard, D. and Tonon, T.** (2014) A metabolic approach to study algal-bacterial  
784 interactions in changing environments. *Mol. Ecol.*, **23**, 1656–60. Available at:  
785 <http://www.ncbi.nlm.nih.gov/pubmed/24447216>.
- 786 **Dittami, S.M., Gravot, A., Goulitquer, S., Rousvoal, S., Peters, A.F., Bouchereau, A., Boyen, C. and  
787 Tonon, T.** (2012) Towards deciphering dynamic changes and evolutionary mechanisms  
788 involved in the adaptation to low salinities in *Ectocarpus* (brown algae). *Plant J.*, **71**, 366–377.  
789 Available at: <http://doi.wiley.com/10.1111/j.1365-3113X.2012.04982.x>.
- 790 **Dittami, S.M., Heesch, S., Olsen, J.L. and Collén, J.** (2017) Transitions between marine and  
791 freshwater environments provide new clues about the origins of multicellular plants and algae  
792 O. DeClerck, ed. *J. Phycol.*, **53**, 731–745. Available at:  
793 <http://doi.wiley.com/10.1111/jpy.12547>.
- 794 **Dittami, S.M., Michel, G., Collén, J., Boyen, C. and Tonon, T.** (2010) Chlorophyll-binding proteins  
795 revisited--a multigenic family of light-harvesting and stress proteins from a brown algal  
796 perspective. *BMC Evol. Biol.*, **10**, 365. Available at:  
797 [http://www.pubmedcentral.nih.gov/articlerender.fcgi?artid=3008699&tool=pmcentrez&rend](http://www.pubmedcentral.nih.gov/articlerender.fcgi?artid=3008699&tool=pmcentrez&rendertype=abstract)  
798 [ertype=abstract](http://www.pubmedcentral.nih.gov/articlerender.fcgi?artid=3008699&tool=pmcentrez&rendertype=abstract).
- 799 **Dittami, S.M., Proux, C., Rousvoal, S., Peters, A.F., Cock, J.M., Coppee, J.-Y., Boyen, C. and Tonon,  
800 T.** (2011) Microarray estimation of genomic inter-strain variability in the genus *Ectocarpus*  
801 (Phaeophyceae). *BMC Mol. Biol.*, **12**, 2. Available at:  
802 <http://www.ncbi.nlm.nih.gov/pubmed/21226968>.
- 803 **Dittami, S.M., Scornet, D., Petit, J.-L., et al.** (2009) Global expression analysis of the brown alga  
804 *Ectocarpus siliculosus* (Phaeophyceae) reveals large-scale reprogramming of the  
805 transcriptome in response to abiotic stress. *Genome Biol.*, **10**, R66. Available at:  
806 <http://genomebiology.com/2009/10/6/R66>.
- 807 **Dittami, S.M. and Tonon, T.** (2012) Genomes of extremophile crucifers: new platforms for  
808 comparative genomics and beyond. *Genome Biol.*, **13**, 166. Available at:  
809 <http://www.ncbi.nlm.nih.gov/pubmed/22897896>.
- 810 **Dong, H.-P., Dong, Y.-L., Cui, L., Balamurugan, S., Gao, J., Lu, S.-H. and Jiang, T.** (2016) High light  
811 stress triggers distinct proteomic responses in the marine diatom *Thalassiosira pseudonana*.  
812 *BMC Genomics*, **17**, 994. Available at:

- 813 <http://bmcbgenomics.biomedcentral.com/articles/10.1186/s12864-016-3335-5>.
- 814 **Dunn, N., Diesh, C., Deepak, et al.** (2017) GMOD/Apollo: Apollo2.0.8(JB#d3827c). *Zenodo*.
- 815 Available at: <https://zenodo.org/record/1063658#.WsTyndNubIE>.
- 816 **Edgar, R.C.** (2004) MUSCLE: multiple sequence alignment with high accuracy and high throughput.
- 817 *Nucleic Acids Res.*, **32**, 1792–7. Available at:
- 818 <http://www.pubmedcentral.nih.gov/articlerender.fcgi?artid=390337&tool=pmcentrez&rendertype=abstract>.
- 819
- 820 **Ellinghaus, D., Kurtz, S. and Willhoeft, U.** (2008) LTRharvest, an efficient and flexible software for
- 821 de novo detection of LTR retrotransposons. *BMC Bioinformatics*, **9**, 18. Available at:
- 822 <http://bmcbioinformatics.biomedcentral.com/articles/10.1186/1471-2105-9-18>.
- 823 **Emms, D.M. and Kelly, S.** (2015) OrthoFinder: solving fundamental biases in whole genome
- 824 comparisons dramatically improves orthogroup inference accuracy. *Genome Biol.*, **16**, 157.
- 825 Available at: <http://genomebiology.com/2015/16/1/157>.
- 826 **Flutre, T., Duprat, E., Feuillet, C. and Quesneville, H.** (2011) Considering transposable element
- 827 diversification in de novo annotation approaches Y. Xu, ed. *PLoS One*, **6**, e16526. Available at:
- 828 <http://dx.plos.org/10.1371/journal.pone.0016526>.
- 829 **Foissac, S., Gouzy, J., Rombauts, S., Mathe, C., Amselem, J., Sterck, L., Peer, Y. V. de, Rouze, P.**
- 830 **and Schiex, T.** (2008) Genome annotation in plants and fungi: EuGene as a model platform.
- 831 *Curr. Bioinform.*, **3**, 11. Available at:
- 832 <http://www.ingentaconnect.com/content/ben/cbio/2008/00000003/00000002/art00003?token=004f12e9145a666f3a7b6c7a407b425b6b414c7d666749264f655d375c6b68763050211ced7c2a>.
- 833
- 834
- 835 **Food and Agriculture Organization of the United Nations, F.** (2016) Global production statistics
- 836 1950-2014. Available at: <http://www.fao.org/fishery/statistics/global-production/en>.
- 837 **Fournier, J.-B., Rebuffet, E., Delage, L., et al.** (2014) The Vanadium Iodoperoxidase from the
- 838 marine flavobacteriaceae species *Zobellia galactanivorans* reveals novel molecular and
- 839 evolutionary features of halide specificity in the vanadium haloperoxidase enzyme family.
- 840 *Appl. Environ. Microbiol.*, **80**, 7561–73. Available at:
- 841 <http://www.ncbi.nlm.nih.gov/pubmed/25261522>.
- 842 **Geiselman, J.A. and McConnell, O.J.** (1981) Polyphenols in brown algae *Fucus vesiculosus* and
- 843 *Ascophyllum nodosum*: Chemical defenses against the marine herbivorous snail, *Littorina*
- 844 *littorea*. *J. Chem. Ecol.*, **7**, 1115–1133. Available at:
- 845 <http://link.springer.com/10.1007/BF00987632>.
- 846 **Goff, S.A., Vaughn, M., McKay, S., et al.** (2011) The iPlant collaborative: cyberinfrastructure for
- 847 plant biology. *Front. Plant Sci.*, **2**, 34. Available at:
- 848 <http://journal.frontiersin.org/article/10.3389/fpls.2011.00034/abstract>.
- 849 **Götz, S., García-Gómez, J.M., Terol, J., et al.** (2008) High-throughput functional annotation and
- 850 data mining with the Blast2GO suite. *Nucleic Acids Res.*, **36**, 3420–35. Available at:
- 851 <http://www.pubmedcentral.nih.gov/articlerender.fcgi?artid=2425479&tool=pmcentrez&rendertype=abstract>.
- 852
- 853 **Grabherr, M.G., Haas, B.J., Yassour, M., et al.** (2011) Full-length transcriptome assembly from
- 854 RNA-Seq data without a reference genome. *Nat. Biotechnol.*, **29**, 644–652. Available at:
- 855 <http://www.nature.com/doifinder/10.1038/nbt.1883>.
- 856 **Gualtieri, T., Ragni, E., Mizzi, L., Fascio, U. and Popolo, L.** (2004) The cell wall sensor Wsc1p is
- 857 involved in reorganization of actin cytoskeleton in response to hypo-osmotic shock in
- 858 *Saccharomyces cerevisiae*. *Yeast*, **21**, 1107–1120. Available at:
- 859 <http://www.ncbi.nlm.nih.gov/pubmed/15484288>.
- 860 **Guindon, S. and Gascuel, O.** (2003) A simple, fast, and accurate algorithm to estimate large

- 861 phylogenies by maximum likelihood. *Syst. Biol.*, **52**, 696–704. Available at:  
862 <http://www.ncbi.nlm.nih.gov/pubmed/14530136>.
- 863 **Heesch, S., Cho, G.Y., Peters, A.F., et al.** (2010) A sequence-tagged genetic map for the brown alga  
864 *Ectocarpus siliculosus* provides large-scale assembly of the genome sequence. *New Phytol.*,  
865 **188**, 42–51. Available at: <http://www.ncbi.nlm.nih.gov/pubmed/20456050>.
- 866 **Hervé, C., Siméon, A., Jam, M., et al.** (2016) Arabinogalactan proteins have deep roots in  
867 eukaryotes: identification of genes and epitopes in brown algae and their role in *Fucus*  
868 *serratus* embryo development. *New Phytol.*, **209**, 1428–1441. Available at:  
869 <http://www.ncbi.nlm.nih.gov/pubmed/26667994>.
- 870 **Hu, T.T., Pattyn, P., Bakker, E.G., et al.** (2011) The *Arabidopsis lyrata* genome sequence and the  
871 basis of rapid genome size change. *Nat. Genet.*, **43**, 476–81. Available at:  
872 [http://www.pubmedcentral.nih.gov/articlerender.fcgi?artid=3083492&tool=pmcentrez&rend](http://www.pubmedcentral.nih.gov/articlerender.fcgi?artid=3083492&tool=pmcentrez&rendertype=abstract)  
873 [ertype=abstract](http://www.pubmedcentral.nih.gov/articlerender.fcgi?artid=3083492&tool=pmcentrez&rendertype=abstract).
- 874 **Karp, P.D., Latendresse, M., Paley, S.M., et al.** (2016) Pathway Tools version 19.0 update: software  
875 for pathway/genome informatics and systems biology. *Brief. Bioinform.*, **17**, 877–890.  
876 Available at: <http://www.ncbi.nlm.nih.gov/pubmed/26454094>.
- 877 **Katoh, K., Misawa, K., Kuma, K. and Miyata, T.** (2002) MAFFT: a novel method for rapid multiple  
878 sequence alignment based on fast Fourier transform. *Nucleic Acids Res.*, **30**, 3059–66.  
879 Available at: <http://www.ncbi.nlm.nih.gov/pubmed/12136088>.
- 880 **Khalturin, K., Hemmrich, G., Fraune, S., Augustin, R. and Bosch, T.C.G.** (2009) More than just  
881 orphans: are taxonomically-restricted genes important in evolution? *Trends Genet.*, **25**, 404–  
882 413. Available at: <http://linkinghub.elsevier.com/retrieve/pii/S0168952509001450>.
- 883 **KleinJan, H., Jeanthon, C., Boyen, C. and Dittami, S.M.** (2017) Exploring the cultivable *Ectocarpus*  
884 microbiome. *Front. Microbiol.*, **8**, 2456. Available at:  
885 <https://www.frontiersin.org/articles/10.3389/fmicb.2017.02456/abstract>.
- 886 **Kloareg, B. and Quatrano, R.S.** (1988) Structure of the cell-walls of marine-algae and  
887 ecophysiological functions of the matrix polysaccharides. *Ocean. Mar Biol*, **26**, 259–315.
- 888 **Kumar, S., Stecher, G. and Tamura, K.** (2016) MEGA7: Molecular Evolutionary Genetics Analysis  
889 Version 7.0 for Bigger Datasets. *Mol. Biol. Evol.*, **33**, 1870–1874. Available at:  
890 <http://www.ncbi.nlm.nih.gov/pubmed/27004904>.
- 891 **Lee, E., Helt, G.A., Reese, J.T., et al.** (2013) Web Apollo: a web-based genomic annotation editing  
892 platform. *Genome Biol.*, **14**, R93. Available at:  
893 <http://genomebiology.biomedcentral.com/articles/10.1186/gb-2013-14-8-r93>.
- 894 **Lee, J., Cho, C.H., Park, S.I., Choi, J.W., Song, H.S., West, J.A., Bhattacharya, D. and Yoon, H.S.**  
895 (2016) Parallel evolution of highly conserved plastid genome architecture in red seaweeds and  
896 seed plants. *BMC Biol.*, **14**, 75. Available at:  
897 <http://bmcbiol.biomedcentral.com/articles/10.1186/s12915-016-0299-5>.
- 898 **Levy, R., Carr, R., Kreimer, A., Freilich, S. and Borenstein, E.** (2015) NetCooperate: a network-  
899 based tool for inferring host-microbe and microbe-microbe cooperation. *BMC Bioinformatics*,  
900 **16**, 164. Available at: <http://www.ncbi.nlm.nih.gov/pubmed/25980407>.
- 901 **Lipinska, A.P., Damme, E.J.M. Van and Clerck, O. De** (2016) Molecular evolution of candidate male  
902 reproductive genes in the brown algal model *Ectocarpus*. *BMC Evol. Biol.*, **16**, 5. Available at:  
903 <http://www.ncbi.nlm.nih.gov/pubmed/26728038>.
- 904 **Liu, M.-J., Zhao, J., Cai, Q.-L., et al.** (2014) The complex jujube genome provides insights into fruit  
905 tree biology. *Nat. Commun.*, **5**, 5315. Available at:  
906 <http://www.nature.com/doifinder/10.1038/ncomms6315>.
- 907 **Lohse, M., Drechsel, O., Kahlau, S. and Bock, R.** (2013) OrganellarGenomeDRAW--a suite of tools  
908 for generating physical maps of plastid and mitochondrial genomes and visualizing expression

- 909 data sets. *Nucleic Acids Res.*, **41**, W575-81. Available at:  
910 <http://www.ncbi.nlm.nih.gov/pubmed/23609545>.
- 911 **Loira, N., Zhukova, A. and Sherman, D.J.** (2015) Pantograph: A template-based method for  
912 genome-scale metabolic model reconstruction. *J. Bioinform. Comput. Biol.*, **13**, 1550006.  
913 Available at: <http://www.worldscientific.com/doi/abs/10.1142/S0219720015500067>.
- 914 **Luo, R., Liu, B., Xie, Y., et al.** (2012) SOAPdenovo2: an empirically improved memory-efficient  
915 short-read de novo assembler. *Gigascience*, **1**, 18. Available at:  
916 <http://gigascience.biomedcentral.com/articles/10.1186/2047-217X-1-18>.
- 917 **Ma, T., Wang, J., Zhou, G., et al.** (2013) Genomic insights into salt adaptation in a desert poplar.  
918 *Nat. Commun.*, **4**, 2797. Available at: <http://www.ncbi.nlm.nih.gov/pubmed/24256998>.
- 919 **McHugh, D.J.** (2003) A guide to the seaweed industry. *FAO Fish. Tech. Pap. (FAO, Rome, Italy)*.
- 920 **Meslet-Cladière, L., Delage, L., Leroux, C.J.-J., et al.** (2013) Structure/Function analysis of a type iii  
921 polyketide synthase in the brown alga *Ectocarpus siliculosus* reveals a biochemical pathway in  
922 phlorotannin monomer biosynthesis. *Plant Cell*, **25**, 3089–103. Available at:  
923 <http://www.plantcell.org/content/early/2013/08/27/tpc.113.111336>.
- 924 **Meyer, F., Paarmann, D., D’Souza, M., et al.** (2008) The metagenomics RAST server - a public  
925 resource for the automatic phylogenetic and functional analysis of metagenomes. *BMC*  
926 *Bioinformatics*, **9**, 386. Available at: <http://www.ncbi.nlm.nih.gov/pubmed/18803844>.
- 927 **Michel, G., Tonon, T., Scornet, D., Cock, J.M. and Kloareg, B.** (2010) The cell wall polysaccharide  
928 metabolism of the brown alga *Ectocarpus siliculosus*. Insights into the evolution of  
929 extracellular matrix polysaccharides in eukaryotes. *New Phytol.*, **188**, 82–97. Available at:  
930 <http://www.ncbi.nlm.nih.gov/pubmed/20618907> [.
- 931 **Mikami, K., Ito, M., Taya, K., Kishimoto, I., Kobayashi, T., Itabashi, Y. and Tanaka, R.** (2018)  
932 Parthenosporophytes of the brown alga *Ectocarpus siliculosus* exhibit sex-dependent  
933 differences in thermotolerance as well as fatty acid and sterol composition. *Mar. Environ. Res.*  
934 Available at: <http://linkinghub.elsevier.com/retrieve/pii/S0141113617306979>.
- 935 **Montecinos, A.E., Couceiro, L., Peters, A.F., Desrut, A., Valero, M. and Guillemin, M.-L.** (2017)  
936 Species delimitation and phylogeographic analyses in the *Ectocarpus* subgroup *siliculosi*  
937 (Ectocarpales, Phaeophyceae) M. Cock, ed. *J. Phycol.*, **53**, 17–31. Available at:  
938 <http://www.ncbi.nlm.nih.gov/pubmed/27454456>.
- 939 **Mosavi, L.K., Cammett, T.J., Desrosiers, D.C. and Peng, Z.** (2004) The ankyrin repeat as molecular  
940 architecture for protein recognition. *Protein Sci.*, **13**, 1435–1448. Available at:  
941 <http://doi.wiley.com/10.1110/ps.03554604>.
- 942 **Mota, C.F., Engelen, A.H., Serrão, E.A. and Pearson, G.A.** (2015) Some don’t like it hot:  
943 microhabitat-dependent thermal and water stresses in a trailing edge population J. Watling,  
944 ed. *Funct. Ecol.*, **29**, 640–649. Available at: <http://doi.wiley.com/10.1111/1365-2435.12373>.
- 945 **Müller, D.G., Kapp, M. and Knippers, R.** (1998) Viruses in marine brown algae. In Academic Press,  
946 pp. 49–67. Available at:  
947 <http://www.sciencedirect.com/science/article/pii/S0065352708608052>.
- 948 **Nguyen, V.H. and Lavenier, D.** (2009) PLAST: parallel local alignment search tool for database  
949 comparison. *BMC Bioinformatics*, **10**, 329. Available at: <http://www.biomedcentral.com/1471-2105/10/329>.
- 951 **Nishitsuji, K., Arimoto, A., Iwai, K., et al.** (2016) A draft genome of the brown alga, *Cladosiphon*  
952 *okamuranus*, S-strain: a platform for future studies of “mozuku” biology. *DNA Res.*, dsw039.  
953 Available at: <http://dnaresearch.oxfordjournals.org/lookup/doi/10.1093/dnares/dsw039>.
- 954 **Oh, D.-H., Dassanayake, M., Bohnert, H.J. and Cheeseman, J.M.** (2012) Life at the extreme: lessons  
955 from the genome. *Genome Biol.*, **13**, 241. Available at:  
956 <http://www.ncbi.nlm.nih.gov/pubmed/22390828>.



- 957 **Oliveira Dal’Molin, C.G. de, Quek, L.-E., Palfreyman, R.W., Brumbley, S.M. and Nielsen, L.K.** (2010)  
958 AraGEM, a genome-scale reconstruction of the primary metabolic network in Arabidopsis.  
959 *Plant Physiol.*, **152**, 579–89. Available at:  
960 <http://www.plantphysiol.org/content/152/2/579.full>.
- 961 **Pavia, H., Cervin, G., Lindgren, A. and Åberg, P.** (1997) Effects of UV-B radiation and simulated  
962 herbivory on phlorotannins in the brown alga *Ascophyllum nodosum*. *Mar. Ecol. Prog. Ser.*,  
963 **157**, 139–146. Available at: <http://www.int-res.com/abstracts/meps/v157/p139-146/>.
- 964 **Peers, G., Truong, T.B., Ostendorf, E., Busch, A., Elrad, D., Grossman, A.R., Hippler, M. and Niyogi,**  
965 **K.K.** (2009) An ancient light-harvesting protein is critical for the regulation of algal  
966 photosynthesis. *Nature*, **462**, 518–21. Available at:  
967 <http://www.ncbi.nlm.nih.gov/pubmed/19940928>.
- 968 **Peters, A.F., Coucerio, L., Tsiamis, K., Küpper, F.C. and Valero, M.** (2015) Barcoding of cryptic  
969 stages of marine brown algae isolated from incubated substratum reveals high diversity.  
970 *Cryptogam. Algal.*, **36**, 3–29.
- 971 **Peters, A.F., Marie, D., Scornet, D., Kloareg, B. and Cock, J.M.** (2004) Proposal of *Ectocarpus*  
972 *siliculosus* (Ectocarpales, Phaeophyceae) as a model organism for brown algal genetics and  
973 genomics. *J. Phycol.*, **40**, 1079–1088.
- 974 **Popper, Z.A., Michel, G., Hervé, C., Domozych, D.S., Willats, W.G.T., Tuohy, M.G., Kloareg, B. and**  
975 **Stengel, D.B.** (2011) Evolution and diversity of plant cell walls: from algae to flowering plants.  
976 *Annu. Rev. Plant Biol.*, **62**, 567–90. Available at:  
977 <http://www.annualreviews.org/doi/abs/10.1146/annurev-arplant-042110-103809>.
- 978 **Prigent, S., Collet, G., Dittami, S.M., et al.** (2014) The genome-scale metabolic network of  
979 *Ectocarpus siliculosus* (EctoGEM): a resource to study brown algal physiology and beyond.  
980 *Plant J.*, **80**, 367–381. Available at: <http://doi.wiley.com/10.1111/tpj.12627>.
- 981 **Prigent, S., Frioux, C., Dittami, S.M., et al.** (2017) Meneco, a Topology-Based Gap-Filling Tool  
982 Applicable to Degraded Genome-Wide Metabolic Networks C. Kaleta, ed. *PLOS Comput. Biol.*,  
983 **13**, e1005276. Available at: <http://dx.plos.org/10.1371/journal.pcbi.1005276>.
- 984 **Rao, A.Q., ud Din, S., Akhtar, S., et al.** (2016) Genomics of salinity tolerance in plants. In I. Y.  
985 Abdurakhmonov, ed. *Plant Genomics*. InTech, pp. 273–299. Available at:  
986 <http://www.intechopen.com/books/plant-genomics/genomics-of-salinity-tolerance-in-plants>.
- 987 **Read, S.M., Currie, G. and Bacic, A.** (1996) Analysis of the structural heterogeneity of laminarin by  
988 electrospray-ionisation-mass spectrometry. *Carbohydr. Res.*, **281**, 187–201.
- 989 **Ritter, A., Dittami, S.M., Goulitquer, S., Correa, J.A., Boyen, C., Potin, P. and Tonon, T.** (2014)  
990 Transcriptomic and metabolomic analysis of copper stress acclimation in *Ectocarpus*  
991 *siliculosus* highlights signaling and tolerance mechanisms in brown algae. *BMC Plant Biol.*, **14**,  
992 116. Available at: <http://www.biomedcentral.com/1471-2229/14/116>.
- 993 **Rival, A., Ilbert, P., Labeyrie, A., et al.** (2013) Variations in genomic DNA methylation during the  
994 long-term in vitro proliferation of oil palm embryogenic suspension cultures. *Plant Cell Rep.*,  
995 **32**, 359–368. Available at: <http://link.springer.com/10.1007/s00299-012-1369-y>.
- 996 **Roeder, V., Collén, J., Rousvoal, S., Corre, E., Leblanc, C. and Boyen, C.** (2005) Identification of  
997 stress gene transcripts in *Laminaria digitata* (Phaeophyceae) protoplast cultures by expressed  
998 sequence tag analysis. *J. Phycol.*, **41**, 1227–1235.
- 999 **Saier, M.H., Reddy, V.S., Tsu, B. V, Ahmed, M.S., Li, C. and Moreno-Hagelsieb, G.** (2016) The  
1000 Transporter Classification Database (TCDB): recent advances. *Nucleic Acids Res.*, **44**, D372-9.  
1001 Available at: <http://www.ncbi.nlm.nih.gov/pubmed/26546518>.
- 1002 **Simão, F.A., Waterhouse, R.M., Ioannidis, P., Kriventseva, E. V. and Zdobnov, E.M.** (2015) BUSCO:  
1003 assessing genome assembly and annotation completeness with single-copy orthologs.  
1004 *Bioinformatics*, **31**, 3210–3212. Available at:

- 1005 <http://bioinformatics.oxfordjournals.org/lookup/doi/10.1093/bioinformatics/btv351>.
- 1006 **Skinner, M.E., Uzilov, A. V, Stein, L.D., Mungall, C.J. and Holmes, I.H.** (2009) JBrowse: a next-
- 1007 generation genome browser. *Genome Res.*, **19**, 1630–8. Available at:
- 1008 <http://www.ncbi.nlm.nih.gov/pubmed/19570905>.
- 1009 **Stache-Crain, B., Müller, D.G. and Goff, L.J.** (1997) Molecular systematics of *Ectocarpus* and
- 1010 *Kuckuckia* (Ectocarpales, Phaeophyceae) inferred from phylogenetic analysis of nuclear- and
- 1011 plastid-encoded DNA sequences. *J. Phycol.*, **33**, 152–168.
- 1012 **Stanke, M., Steinkamp, R., Waack, S. and Morgenstern, B.** (2004) AUGUSTUS: a web server for
- 1013 gene finding in eukaryotes. *Nucleic Acids Res.*, **32**, W309–12. Available at:
- 1014 [http://www.pubmedcentral.nih.gov/articlerender.fcgi?artid=441517&tool=pmcentrez&rende](http://www.pubmedcentral.nih.gov/articlerender.fcgi?artid=441517&tool=pmcentrez&rendertype=abstract)
- 1015 [rtype=abstract](http://www.pubmedcentral.nih.gov/articlerender.fcgi?artid=441517&tool=pmcentrez&rendertype=abstract).
- 1016 **Starr, R.C. and Zeikus, J.A.** (1993) Utex - the culture collection of algae at the University of Texas at
- 1017 Austin: 1993 list of cultures. *J. Phycol.*, **29**, 1–106.
- 1018 **Swanson, W.J. and Vacquier, V.D.** (2002) The rapid evolution of reproductive proteins. *Nat. Rev.*
- 1019 *Genet.*, **3**, 137–44. Available at: <http://www.ncbi.nlm.nih.gov/pubmed/11836507>.
- 1020 **Tan, S., Cardoso-Moreira, M., Shi, W., et al.** (2016) LTR-mediated retroposition as a mechanism of
- 1021 RNA-based duplication in metazoans. *Genome Res.*, **26**, 1663–1675. Available at:
- 1022 <http://www.ncbi.nlm.nih.gov/pubmed/27934698>.
- 1023 **Tautz, D. and Domazet-Lošo, T.** (2011) The evolutionary origin of orphan genes. *Nat. Rev. Genet.*,
- 1024 **12**, 692–702. Available at: <http://www.nature.com/articles/nrg3053>.
- 1025 **Teng, L., Fan, X., Xu, D., Zhang, X., Mock, T. and Ye, N.** (2017) Identification of genes under positive
- 1026 selection reveals differences in evolutionary adaptation between brown-algal species. *Front.*
- 1027 *Plant Sci.*, **8**, 1429. Available at:
- 1028 <http://journal.frontiersin.org/article/10.3389/fpls.2017.01429/full>.
- 1029 **Tonon, T., Li, Y. and McQueen-Mason, S.** (2017) Mannitol biosynthesis in algae: more widespread
- 1030 and diverse than previously thought. *New Phytol.*, **213**, 1573–1579. Available at:
- 1031 <http://doi.wiley.com/10.1111/nph.14358>.
- 1032 **Torode, T.A., Marcus, S.E., Jam, M., Tonon, T., Blackburn, R.S., Hervé, C. and Knox, J.P.** (2015)
- 1033 Monoclonal antibodies directed to fucoidan preparations from brown algae. *PLoS One*, **10**,
- 1034 e0118366. Available at:
- 1035 [http://www.pubmedcentral.nih.gov/articlerender.fcgi?artid=4333822&tool=pmcentrez&rend](http://www.pubmedcentral.nih.gov/articlerender.fcgi?artid=4333822&tool=pmcentrez&rendertype=abstract)
- 1036 [ertype=abstract](http://www.pubmedcentral.nih.gov/articlerender.fcgi?artid=4333822&tool=pmcentrez&rendertype=abstract).
- 1037 **Tulsiani, D.R., Hubbard, S.C., Robbins, P.W. and Touster, O.** (1982) alpha-D-mannosidases of rat
- 1038 liver golgi membranes. Mannosidase II is the GlcNAcMAN5-cleaving enzyme in glycoprotein
- 1039 biosynthesis and mannosidases Ia and IB are the enzymes converting Man9 precursors to
- 1040 Man5 intermediates. *J. Biol. Chem.*, **257**, 3660–8. Available at:
- 1041 <http://www.ncbi.nlm.nih.gov/pubmed/7061502>.
- 1042 **Verna, J., Lodder, A., Lee, K., Vagts, A. and Ballester, R.** (1997) A family of genes required for
- 1043 maintenance of cell wall integrity and for the stress response in *Saccharomyces cerevisiae*.
- 1044 *Proc. Natl. Acad. Sci. U. S. A.*, **94**, 13804. Available at:
- 1045 <http://www.ncbi.nlm.nih.gov/pubmed/9391108>.
- 1046 **Volkov, V.** (2015) Salinity tolerance in plants. Quantitative approach to ion transport starting from
- 1047 halophytes and stepping to genetic and protein engineering for manipulating ion fluxes. *Front.*
- 1048 *Plant Sci.*, **6**, 873. Available at:
- 1049 <http://journal.frontiersin.org/Article/10.3389/fpls.2015.00873/abstract>.
- 1050 **Wächter, G.A., Franzblau, S.G., Montenegro, G., Hoffmann, J.J., Maiese, W.M. and Timmermann,**
- 1051 **B.N.** (2001) Inhibition of *Mycobacterium tuberculosis* growth by saringosterol from *Lessonia*
- 1052 *nigrescens*. *J. Nat. Prod.*, **64**, 1463. Available at:



- 1053 <https://pubs.acs.org/doi/abs/10.1021/np010101q>.
- 1054 **Waterhouse, A.M., Procter, J.B., Martin, D.M.A., Clamp, M. and Barton, G.J.** (2009) Jalview
- 1055 Version 2--a multiple sequence alignment editor and analysis workbench. *Bioinformatics*, **25**,
- 1056 1189–91. Available at:
- 1057 [http://www.pubmedcentral.nih.gov/articlerender.fcgi?artid=2672624&tool=pmcentrez&rend](http://www.pubmedcentral.nih.gov/articlerender.fcgi?artid=2672624&tool=pmcentrez&rendertype=abstract)
- 1058 [ertype=abstract](http://www.pubmedcentral.nih.gov/articlerender.fcgi?artid=2672624&tool=pmcentrez&rendertype=abstract).
- 1059 **West, J. and Kraft, G.** (1996) *Ectocarpus siliculosus* (Dillwyn) Lyngb. from Hopkins River Falls,
- 1060 Victoria - the first record of a freshwater brown alga in Australia. *Muelleria*, **9**, 29–33.
- 1061 **Wu, H.-J., Zhang, Z., Wang, J.-Y., et al.** (2012) Insights into salt tolerance from the genome of
- 1062 *Thellungiella salsuginea*. *Proc. Natl. Acad. Sci. U. S. A.*, **109**, 12219–24. Available at:
- 1063 <http://www.ncbi.nlm.nih.gov/pubmed/22778405>.
- 1064 **Yang, Z.** (2007) PAML 4: phylogenetic analysis by maximum likelihood. *Mol. Biol. Evol.*, **24**, 1586–
- 1065 91. Available at: <http://www.ncbi.nlm.nih.gov/pubmed/17483113>.
- 1066 **Ye, N., Zhang, X., Miao, M., et al.** (2015) *Saccharina* genomes provide novel insight into kelp
- 1067 biology. *Nat. Commun.*, **6**, 6986. Available at:
- 1068 <http://www.nature.com/ncomms/2015/150424/ncomms7986/full/ncomms7986.html>.
- 1069 **Yoon, H.S., Hackett, J.D., Ciniglia, C., Pinto, G. and Bhattacharya, D.** (2004) A molecular timeline
- 1070 for the origin of photosynthetic eukaryotes. *Mol. Biol. Evol.*, **21**, 809–18. Available at:
- 1071 <http://mbe.oxfordjournals.org/cgi/content/abstract/21/5/809>.
- 1072 **Zeng, X., Long, H., Wang, Z., et al.** (2015) The draft genome of Tibetan hulless barley reveals
- 1073 adaptive patterns to the high stressful Tibetan Plateau. *Proc. Natl. Acad. Sci. U. S. A.*, **112**,
- 1074 1095–100. Available at: <http://www.ncbi.nlm.nih.gov/pubmed/25583503>.
- 1075 **Zhu, S.-H. and Green, B.R.** (2010) Photoprotection in the diatom *Thalassiosira pseudonana*: Role of
- 1076 LI818-like proteins in response to high light stress. *Biochim. Biophys. Acta - Bioenerg.*, **1797**,
- 1077 1449–1457. Available at: <http://linkinghub.elsevier.com/retrieve/pii/S0005272810001362>.
- 1078

1079 **Figures**

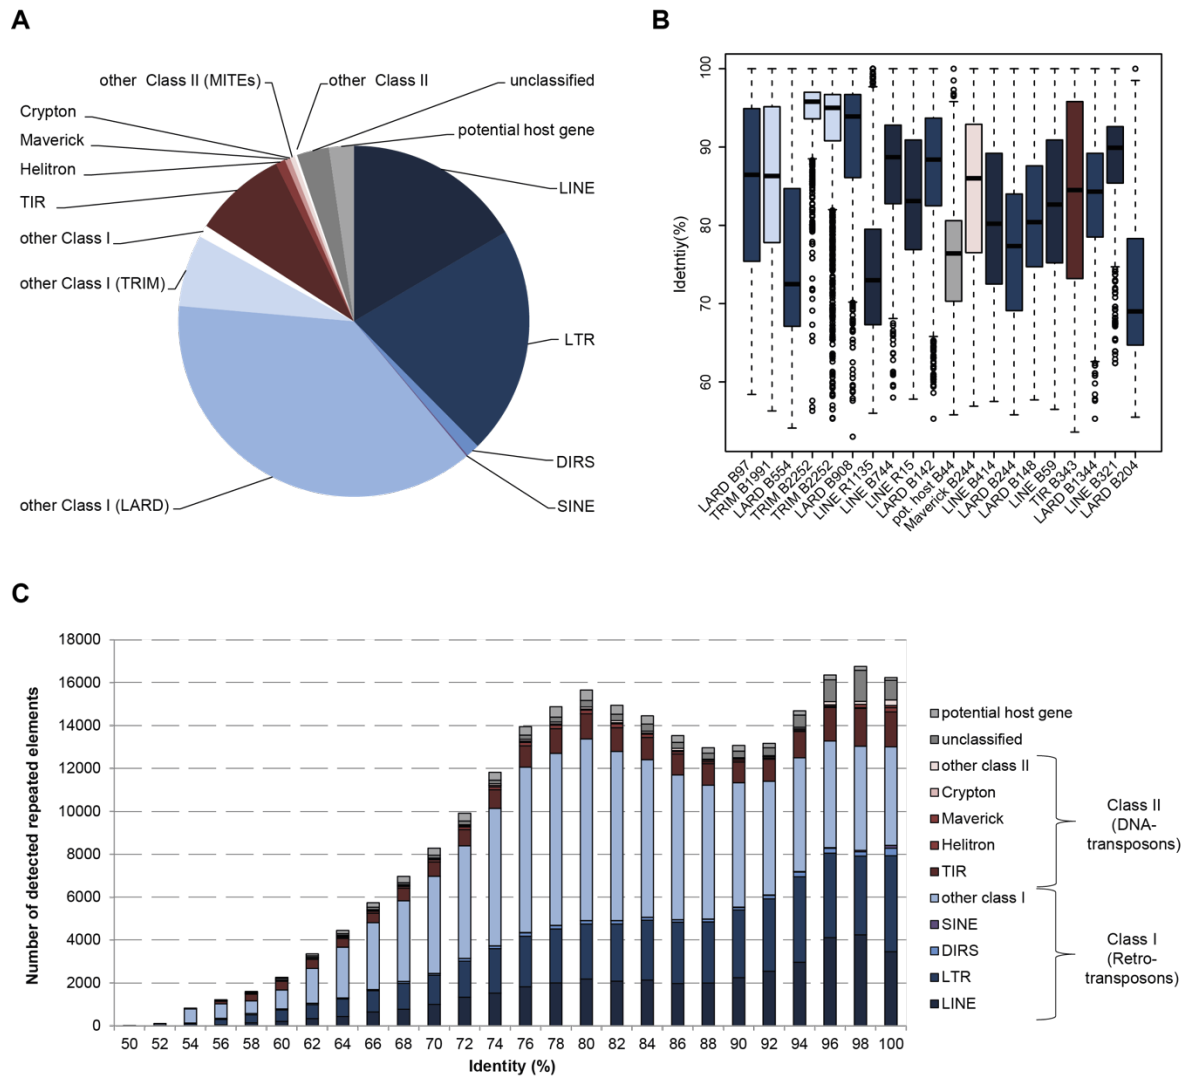

1080

1081 **Figure 1:** Repeated elements identified within the genome of *E. subulatus*. A) Different superfamilies  
 1082 detected; B) Boxplot of sequence identity levels for the 20 most abundant transposon families; C)  
 1083 Distribution of sequence identities in the superfamilies.

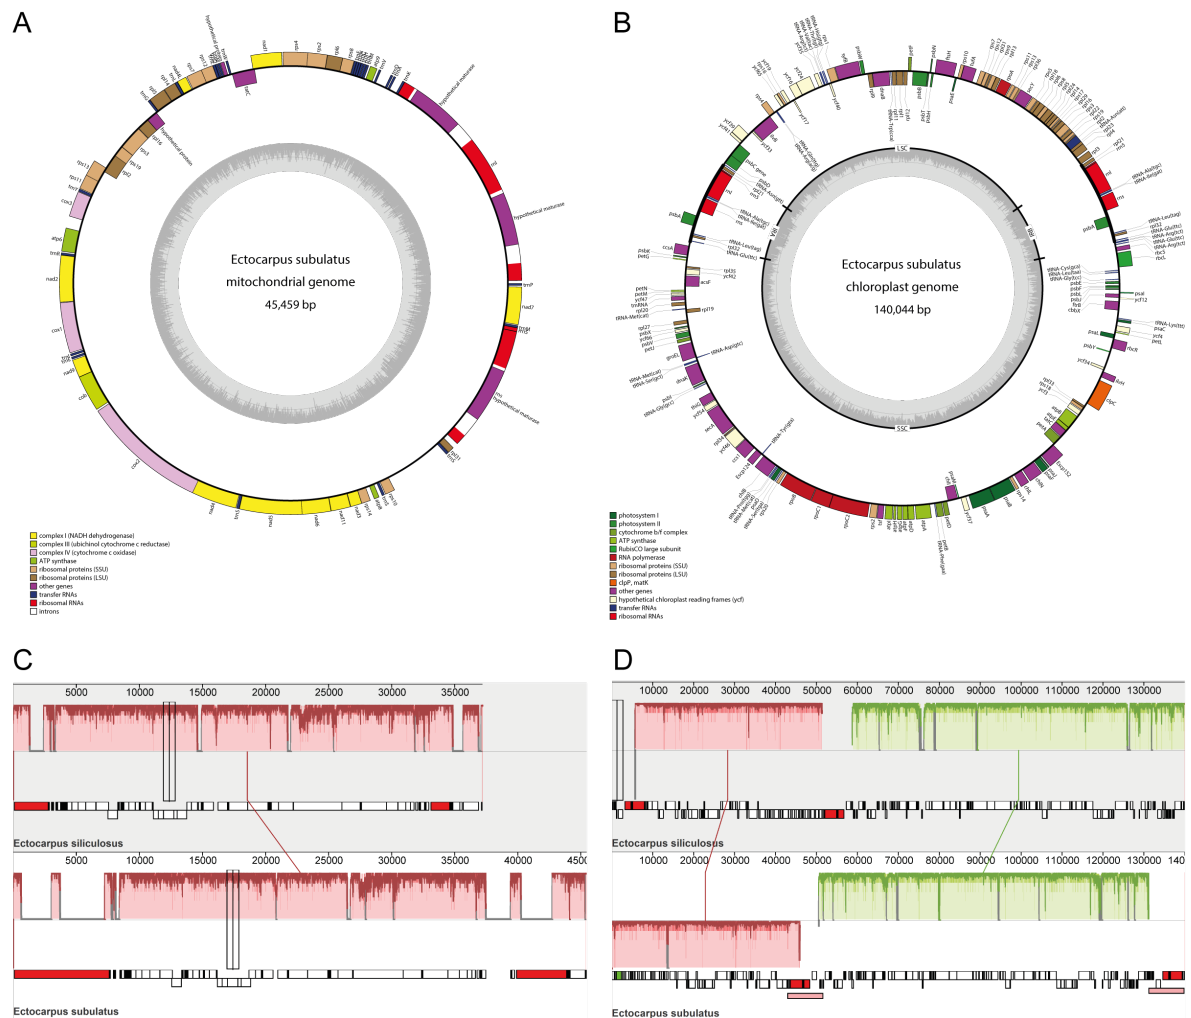

1084

1085 **Figure 2:** Mitochondrial and plastidial genomes of *E. subulatus* Bft15b visualized using  
1086 OrganellarGenomeDRAW (Lohse *et al.*, 2013) (panels A and B), and aligned with the *Ectocarpus* sp.  
1087 Ec32 organelles using Mauve (panels C and D). In panels C and D blocks of the same color correspond  
1088 to orthologous sequences.

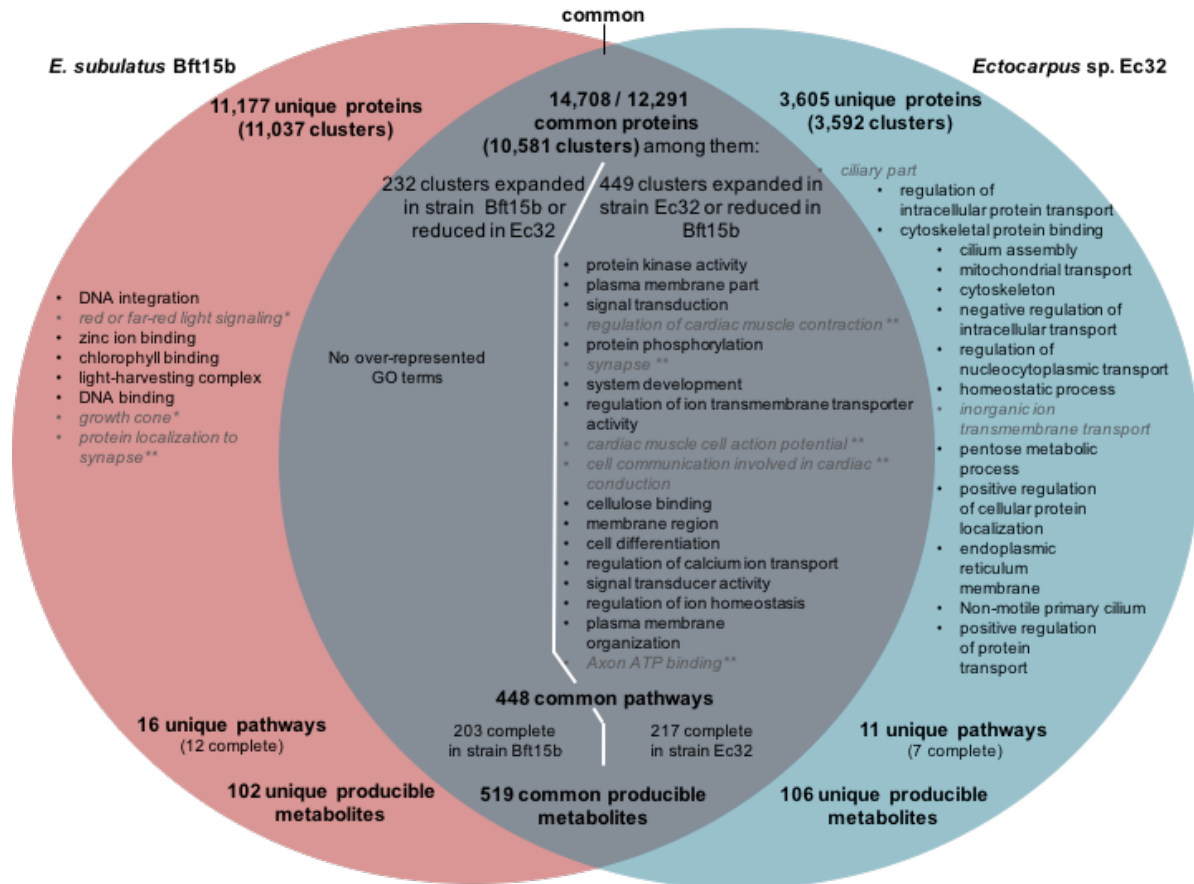

1089

1090 **Figure 3:** Comparison of gene content and metabolic capacities of *E. subulatus* and *Ectocarpus* sp.  
 1091 Ec32. The top part of the Venn diagram displays the number of predicted proteins and protein  
 1092 clusters unique and common to both genomes in the OrthoFinder analysis. The middle part shows  
 1093 GO annotations significantly enriched ( $FDR \leq 0.05$ ) among these proteins. For the common clusters,  
 1094 the diagram also contains the results of gene set enrichment analyses for annotations found among  
 1095 clusters expanded in *E. subulatus* Bft15b and those expanded in *Ectocarpus* sp. Ec32. Functional  
 1096 annotations not directly relevant to the functioning of *Ectocarpus* or shown to be false positives are  
 1097 shown in grey and italics. The bottom part shows the comparison of both genomes in terms of their  
 1098 metabolic pathways.

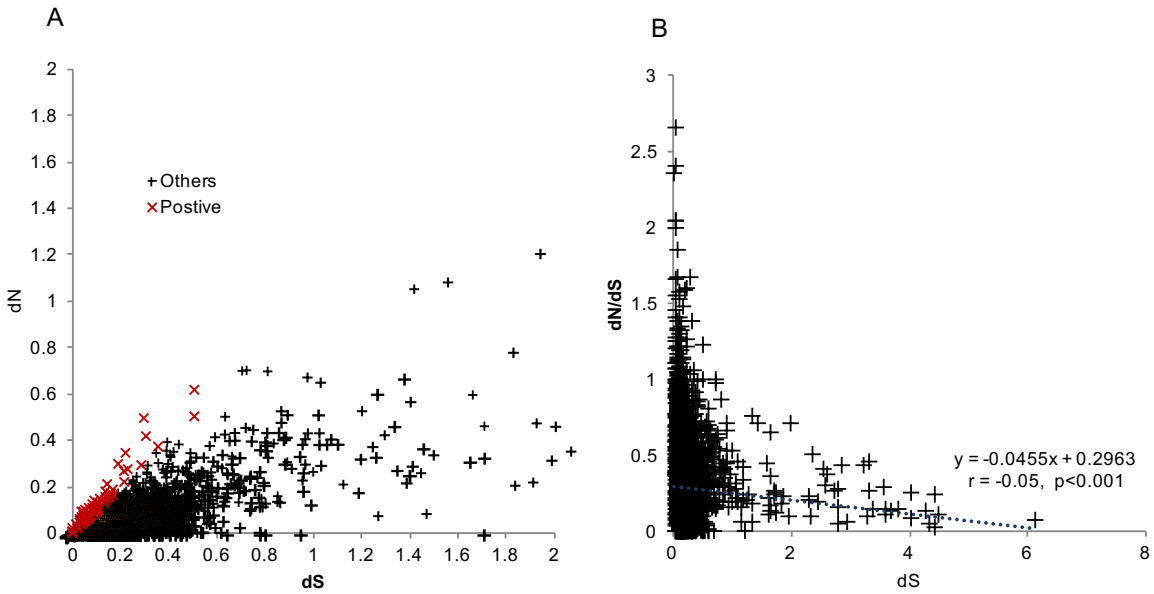

1099

1100 **Figure 4:** Rate of non-synonymous (dN) to synonymous (dS) mutations in 7,147 orthologous gene  
1101 pairs with one copy in each examined species of *Ectocarpus*. Gene pairs with  $dN/dS > 1$  are  
1102 considered to be under positive selection and displayed in red panel A. The resulting ratio was plotted  
1103 against the rate of synonymous mutations (speed of evolution) and dotted line corresponds to a  
1104 linear regression (panel B).



| GENES:                      | <i>E. sp.</i> | <i>E. su</i> | <i>S. ja</i> |
|-----------------------------|---------------|--------------|--------------|
| <b>Glycosyltransferases</b> |               |              |              |
| GT1                         | 1             | 1            | 3            |
| GT2                         | 11            | 9            | 24           |
| GT4                         | 13            | 14           | 13           |
| GT7                         | 1             | 1            | 1            |
| GT8                         | 3             | 4            | 5            |
| GT10                        | 1             | 1            | 2            |
| GT13                        | 2             | 2            | 1            |
| GT14                        | 5             | 5            | 1            |
| GT15                        | 1             | 0            | 0            |
| GT18                        | 0             | 1            | 0            |
| GT20                        | 6             | 8            | 4            |
| GT22                        | 3             | 3            | 2            |
| GT23                        | 2             | 2            | 17           |
| GT24                        | 1             | 2            | 0            |
| GT25                        | 3             | 0            | 1            |
| GT27                        | 0             | 0            | 1            |
| GT28                        | 0             | 3            | 4            |
| GT31                        | 3*            | 5            | 4            |
| GT33                        | 1             | 1            | 0            |
| GT34                        | 1             | 1            | 1            |
| GT41                        | 3             | 3            | 4            |
| GT47                        | 8             | 5            | 14           |
| GT48                        | 3             | 4            | 2            |
| GT49                        | 3             | 2            | 1            |
| GT50                        | 1             | 0            | 1            |
| <b>Halogen metabolism</b>   |               |              |              |
| vBPO                        | 1             | 1            | 17           |
| vIPO                        | 0             | 0            | 59           |
| vHPO                        | 5             | 3            | 2            |
| TPO                         | 7             | 5            | 19           |
| HLD                         | 1             | 0            | 0            |

  

| GENES:                                         | <i>E. sp.</i> | <i>E. su</i> | <i>S. ja</i> |
|------------------------------------------------|---------------|--------------|--------------|
| <b>Glycoside hydrolases</b>                    |               |              |              |
| GH1                                            | 3             | 2            | 1            |
| GH2                                            | 2             | 3            | 3            |
| GH3                                            | 1             | 1            | 1            |
| GH5                                            | 2             | 2            | 2            |
| GH10                                           | 1             | 1            | 1            |
| GH13                                           | 0             | 0            | 1            |
| GH16                                           | 6             | 7            | 3            |
| GH17                                           | 1             | 1            | 2            |
| GH18                                           | 0             | 0            | 1            |
| GH30                                           | 1             | 0            | 1            |
| GH31                                           | 1             | 1            | 0            |
| GH36                                           | 2             | 2            | 0            |
| GH37                                           | 1             | 1            | 1            |
| GH38                                           | 1             | 1            | 0            |
| GH47                                           | 5             | 5            | 2            |
| GH63                                           | 1             | 1            | 0            |
| GH81                                           | 5             | 4            | 53           |
| GH85                                           | 1             | 1            | 1            |
| GH88                                           | 6             | 3            | 1            |
| GH95                                           | 1             | 1            | 0            |
| GH114                                          | 0             | 0            | 7            |
| GH128                                          | 0             | 0            | 1            |
| <b>Alginate metabolism</b>                     |               |              |              |
| MPI                                            | 4             | 4            | 5            |
| PMM                                            | 1             | 0            | 1            |
| MPG                                            | 0             | 0            | ?            |
| GMD                                            | 3             | 2            | 3            |
| MS                                             | 2             | 1            | 1            |
| ManC5-E                                        | 28            | 24           | 105          |
| <b>Fucan metabolism</b>                        |               |              |              |
| FK                                             | 2             | 1            | 1            |
| GFPP                                           | 2             | 1            | 1            |
| GM46D                                          | 2             | 2            | 1            |
| GFS                                            | 1             | 1            | 1            |
| <b>Sulfatases &amp; sulfotransferases (ST)</b> |               |              |              |
| Sulfatases                                     | 9             | 9            | n. i.        |
| ST                                             | 15            | 13           | 24           |
| <b>Phenolics</b>                               |               |              |              |
| PKS III                                        | 3             | 3            | 2            |
| CHIL                                           | 2             | 2            | 2            |
| AST                                            | 5             | 3            | 7            |
| FGT                                            | 1             | 1            | 1            |
| OMT                                            | 1             | 1            | 1            |
| POX                                            | 1             | 1            | 2            |
| TYR                                            | 28            | 20           | 22           |

1105

1106

1107

1108

1109

1110

1111

1112

1113

1114

1115

1116

1117

1118

1119

**Figure 5:** Prevalence of several genes families related to key metabolic pathways in brown algae. *E. sp.*, *Ectocarpus sp.* Ec32; *E. su*, *Ectocarpus subulatus*; *S. ja*, *Saccharina japonica*; GT, glycosyltransferase; GH, glycosyl hydrolase; vBPO, vanadium-dependent bromoperoxidase; vIPO, vanadium-dependent ioperoxidase; vHPO, vanadium-dependent haloperoxidase; TPO, homolog of thyroid peroxidase; HLD, haloalkane dehalogenase; MPI, mannose-6-phosphate isomerase; PMM, phosphomannomutase; MPG, mannose-1-phosphate guanyltransferase; GMD, GDP-mannose 6-dehydrogenase; MS, mannuronan synthase; ManC5-E, mannuronan C5-epimerase; FK, L-fucokinase; GFPP, GDP-fucose pyrophosphorylase; GM46D, GDP-mannose 4,6-dehydratase; GFS, GDP-L-fucose synthetase; ST, sulfotransferase; PKS III, type III polyketide synthase; CHIL, chalcone isomerase-like; AST, aryl sulfotransferase; FGT, flavonoid glucosyltransferase; OMT, flavonoid O-methyltransferase (OMT); POX, polyphenol oxidase; TYR, tyrosinase. \*for GT31, three genes have been identified in *Ectocarpus sp.* Ec32 in the present study that have not been initially annotated in the corresponding genome (Cock *et al.*, 2010) and companion paper (Michel *et al.*, 2010). n. i.: The presence of sulfatases in the *S. japonica* genome was not indicated in the corresponding paper (Ye *et al.*, 2015)

1120

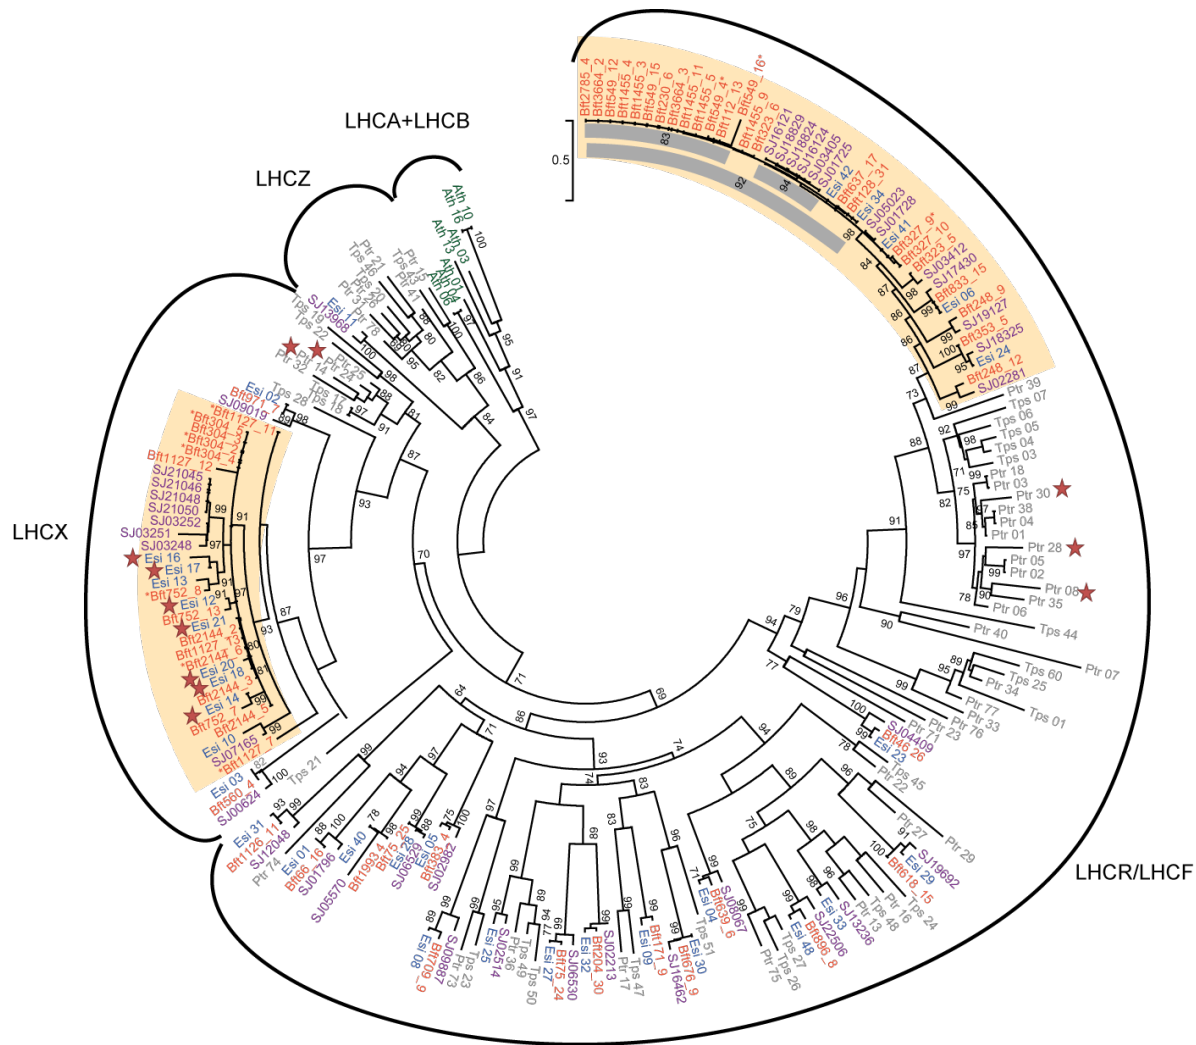

1121

1122 **Figure 6:** Maximum likelihood tree of *E. subulatus* Bft15b (orange) *Ectocarpus* sp. Ec32 (blue), *S.*  
 1123 *latissima* (purple), and diatom (*Thalassiosira pseudonana* and *Phaeodactylum tricornutum*, grey) CBP  
 1124 sequences. Support values correspond to bootstrap values from 100 replicate runs. *A. thaliana*  
 1125 sequences (green) were added as outgroup. Accessions for *E. subulatus* are given without the Esu  
 1126 prefix, for *Ectocarpus* sp. Ec32, diatoms and *A. thaliana* see (Dittami *et al.*, 2010). Stars indicate genes  
 1127 that have been previously shown to be stress-induced (Dittami *et al.*, 2010), asterisks next to the  
 1128 protein names indicate incomplete proteins. Probable expansions in *E. subulatus* are indicated by an  
 1129 other background.

## 1130 Tables

1131 **Table 1:** Assembly statistics of the two available *Ectocarpus* and of the *S. japonica* genomes.

|                     | <i>Ectocarpus</i> Ec32 | <i>E. subulatus</i> Bft15b | <i>S. japonica</i> |
|---------------------|------------------------|----------------------------|--------------------|
| Sequencing strategy | Sanger+Bac libraries   | Illumina (PE+MP)           | Illumina PE+PacBio |

|                               |                          |                          |                          |
|-------------------------------|--------------------------|--------------------------|--------------------------|
| Genome size (flow cytometry)  | 214*                     | 227                      | 545**                    |
| Genome size (sequenced)       | 196 Mb                   | 242 Mb                   | 537 Mb**                 |
| Sequencing Coverage           | 11 X <sup>#</sup>        | 124 X                    | 178 X**                  |
| G/C contents                  | 53%                      | 54%                      | 50%                      |
| Number of scaffolds >2kb      | 1,561                    | 5,286                    | 6,985                    |
| Scaffold N50 (kb)             | 497 kb                   | 113 kb                   | 254 kb                   |
| Number of predicted genes     | 17,418                   | 25,939                   | 18,733                   |
| Mean number of exons per gene | 8.0                      | 5.3                      | 6.5**                    |
| Repetitive elements           | 30%                      | 30%                      | 40%                      |
| BUSCO genome completeness     | 94% (99%* <sup>#</sup> ) | 86% (91%* <sup>#</sup> ) | 91% (96%* <sup>#</sup> ) |
| BUSCO Fragmented proteins     | 7.4%                     | 13.5%                    | 14.2%                    |

1132 \* according to (Peters *et al.*, 2004)

1133 \*\* according to (Ye *et al.*, 2015)

1134 <sup>#</sup> according to (Cock *et al.*, 2010)

1135 <sup>##</sup> 23% according to (Cock *et al.*, 2010), but 30% when re-run with the current version (2.5) of the  
1136 REPET pipeline.

1137 \*<sup>#</sup> not considering proteins absent from all three brown algal genomes

1138 **Table 2:** Clusters of orthologous genes as identified by OrthoFinder expanded in the genome of *E.*  
1139 *subulatus* Bft15b after manual identification of false positives, and removal of clusters without  
1140 functional annotation or related to transposon or viral sequences.

| Cluster(s)                                        | # Ec32 | # Bft15b | Putative annotation or functional domain |
|---------------------------------------------------|--------|----------|------------------------------------------|
| <i>Cell-wall related proteins</i>                 |        |          |                                          |
| OG0000597                                         | 1      | 3        | Peptidoglycan-binding domain             |
| OG0000284, -782, -118                             | 6      | 12       | Carbohydrate-binding WSC domain          |
| OG0000889                                         | 1      | 2        | Cysteine desulfuration protein           |
| OG0000431                                         | 1      | 3        | Galactose-3-O-sulfotransferase (partial) |
| <i>Transcriptional regulation and translation</i> |        |          |                                          |
| OG0000785                                         | 1      | 2        | AN1-type zinc finger protein             |
| OG0000059                                         | 4      | 10       | C2H2 zinc finger protein                 |
| OG0000884                                         | 1      | 2        | Zinc finger domain                       |
| OG0000766                                         | 1      | 2        | DNA-binding SAP domain                   |
| OG0000853                                         | 1      | 2        | RNA binding motif protein                |

|                                              |   |   |                                                  |
|----------------------------------------------|---|---|--------------------------------------------------|
| OG0000171                                    | 1 | 6 | Helicase                                         |
| OG0000819                                    | 1 | 2 | Fungal transcriptional regulatory protein domain |
| OG0000723                                    | 1 | 2 | Translation initiation factor eIF2B              |
| OG0000364                                    | 2 | 3 | Ribosomal protein S15                            |
| OG0000834                                    | 1 | 2 | Ribosomal protein S13                            |
| <i>Cell-cell communication and signaling</i> |   |   |                                                  |
| OG0000967                                    | 1 | 2 | Ankyrin repeat-containing domain                 |
| OG0000357                                    | 2 | 3 | Regulator of G protein signaling domain          |
| OG0000335                                    | 2 | 3 | Serine/threonine kinase domain                   |
| OG0000291                                    | 2 | 3 | Protein kinase                                   |
| OG0000185                                    | 3 | 4 | Octicosapeptide/Phox/Bem1p domain                |
| <i>Others</i>                                |   |   |                                                  |
| OG0000726                                    | 1 | 3 | HSP20                                            |
| OG0000104                                    | 1 | 9 | Light harvesting complex protein                 |
| OG0000277                                    | 3 | 3 | Major facilitator superfamily transporter        |
| OG0000210                                    | 2 | 4 | Cyclin-like domain                               |
| OG0000721                                    | 1 | 2 | Myo-inositol 2-dehydrogenase                     |
| OG0000703                                    | 1 | 2 | Short-chain dehydrogenase                        |
| OG0000749                                    | 1 | 2 | Putative Immunophilin                            |
| OG0000463                                    | 1 | 3 | Zinc-dependent metalloprotease with notch domain |

## 1141 **Supporting Information**

1142 **Supporting Information Table S1:** Complete table of manual protein annotations.

1143 **Supporting Information Table S2:** Domain-based comparisons between *E. subulatus* and *Ectocarpus*  
1144 sp. Ec32.

1145 **Supporting Information Table S3.** Comparison of metabolic pathways found in *E. subulatus* and  
1146 *Ectocarpus* sp. Ec32.

1147 **Supporting Information Table S4:** Values of dN/dS associated with orthologous gene pairs between  
1148 *E. subulatus* and *Ectocarpus* sp. Ec32.

1149 **Supporting Information Table S5:** Complete list of OrthoFinder results.

1150 **Supporting Information File S1:** Supplementary text concerning the automatic annotation of red-far  
1151 sensors, CAZymes, polyamine metabolism, and stress response genes in *E. subulatus*.
